# Supplementary material for: Characterizing carbonyl compounds and their sources in Fuzhou ambient air, southeast of China
Source: PeerJ. 2020 Nov 5;8:e10227. doi: 10.7717/peerj.10227 (PMC7649009; doi:10.7717/peerj.10227)
Supplement: Supplemental Information 1 [file peerj-08-10227-s001.xlsx]

## Sheet: GSS
time	formaldehyde	acetaldehyde	acrolein	acetone	propionaldehyde	crotoraldehyde	butyaldehyde	benzaldehyde	isovaleraldehyde	valeraldehyde	o-Tolualdehyde	m-Tolualdehyde	p-Tolualdehyde	hexaldehyde	2,5-diemthybenzaldehyde	MACR	total
2018-05-08 01:00:30	1.53411	0.681421		0.09058	0.0789562	0.0635627	0.0472038	0.0185283	0.188733			0.00857077		0.01873		0.116739	2.84713
2018-05-08 03:00:30	0.809946	0.543667		0.0632614	0.0103382	0.0245462	0.069725	0.0199355	0.0987912		0.00100985	0.0056189		0.0090016		0.0474945	1.70334
2018-05-08 05:00:30	0.505361	0.653869		0.0263009	0.0241582	0.0261441	0.0495335	0.0194078	0.0669323		0.000932167	0.00336616		0.0269302			1.40294
2018-05-08 07:00:30	0.890752	0.751356		0.101829	0.0612793	0.015358	0.0303776	0.0327762	0.117213		0.00551532	0.00142414		0.0169595			2.02484
2018-05-08 09:00:30	1.55897	1.9212		0.431258	0.371907		0.1778	0.0466724	0.280841		0.00264114	0.000569657		0.0469647			4.83882
2018-05-08 11:00:30	1.10831	1.69655		0.222352	0.113506		0.0793026	0.0220462	0.332855					0.0333598			3.60828
2018-05-08 13:00:30	2.37637	2.24121		0.246456	0.183891	0.00909937	0.0874568	0.0228378	0.370782					0.0915997			5.6297
2018-05-08 15:00:30	1.27614	2.09285		0.1645	0.114791	0.0204181	0.0481096	0.0404278	0.413043		0.00388401	0.00321079		0.00594513			4.18332
2018-05-08 17:00:30	0.71981	1.37654		0.117898	0.0903653	0.040126	0.0545811	0.0414832	0.188732		0.00194201			0.00205936		0.020862	2.6544
2018-05-08 19:00:30	0.589274	1.20488		0.175749	0.138896	0.0313373	0.0585934	0.0337436	0.0538201			0.00701711		0.0675582			2.36086
2018-05-08 21:00:30	1.04304	1.08832		0.228779	0.0977572	0.0300057	0.0560048	0.0451771	0.133467		0.00108752	0.00406526		0.0326143		0.0195303	2.77984
2018-05-08 23:00:30	0.65454	1.08408		0.299485	0.13761	0.00750141	0.0928926	0.0340953	0.191982			0.00150181		0.0183572			2.52204
2018-05-09 01:00:30	0.853451	1.28117		0.227171	0.0832944		0.0852561	0.050366	0.147554		0.00225272			0.0352233			2.76574
2018-05-09 03:00:30	1.30411	1.17732		0.228778	0.0559759	0.0680896	0.04798	0.0267954	0.219073		0.00163128	0.00639565		0.0373665		0.0554837	3.229
2018-05-09 05:00:30	0.716699	1.30448		0.142002	0.0222297	0.0261439	0.0791727	0.055555	0.14647		0.00132056	0.00297773		0.0551645		0.0395044	2.59172
2018-05-09 07:00:30	0.651431	1.64568		0.231992	0.150144	0.00057703	0.0940572	0.0410433	0.117212		0.00800103	0.00515276		0.034571		0.00221935	2.98208
2018-05-09 09:00:30	0.548867	2.02926		0.220743	0.140502		0.0965163	0.0331277	0.158389		0.00512687	0.00561884		0.0388574			3.27701
2018-05-09 11:00:30	0.996414	3.19486		0.252882	0.153358		0.0641586	0.0412191	0.286256		0.00473847	0.00693939		0.0425847			5.04341
2018-05-09 13:00:30	1.47815	4.08494		0.381438	0.227278		0.0853851	0.0310169	0.476973					0.0350368			6.80022
2018-05-09 15:00:30	1.21086	3.27962		0.296269	0.121057		0.10247	0.0364698	0.35019					0.0256253			5.42257
2018-05-09 17:00:30	1.75475	2.87696		0.273772	0.0628856	0.0201516	0.0873265	0.0382287	0.21257		0.00310718	0.00779385		0.0314958		0.00621415	5.37526
2018-05-09 19:00:30	0.629672	1.60753		0.170926	0.102095	0.0162899	0.0384019	0.0197593	0.135633			0.00111341		0.0213389			2.74276
2018-05-09 21:00:30	0.579945	1.7262		0.212707	0.161392	0.00110967	0.0803371	0.0195834	0.121546			0.00779384		0.0140706			2.92469
2018-05-09 23:00:30	0.418331	1.6054		0.138787	0.111094	0.0128277	0.0799488	0.0404274	0.144302		0.00116519			0.0411868			2.59347
2018-05-10 01:00:30	0.940466	1.49732		0.0953994	0.055172	0.018021	0.0241645	0.0129872	0.109626		0.00815634	0.00693936		0.0180774		0.0301829	2.81651
2018-05-10 03:00:30	0.691829	1.58633		0.132359	0.112219		0.0763247	0.02187	0.139967		0.00660274	0.00546345		0.00931826			2.78228
2018-05-10 05:00:30	0.875198	1.54182		0.151643	0.0876323		0.0768423	0.0139546	0.112876			0.0458567		0.0150024			2.92083
2018-05-10 07:00:30	1.98784	2.05044		0.532489	0.100166		0.0477206	0.0519486	0.206067		0.0126617	0.000414289		0.056189			5.04594
2018-05-10 09:00:30	0.983975	2.87694		0.315551	0.244952		0.101175	0.0323359	0.233157			0.0357583		0.0180774			4.84193
2018-05-10 11:00:30	0.79439	3.5551		0.27377	0.275484		0.090044	0.0468475	0.369692		0.000155358	0.0147849		0.0322411			5.45251
2018-05-10 13:00:30	0.53643	3.19483		0.304302	0.252987		0.110753	0.040691	0.449879		0.00139822	0.00701701		0.037832			4.93612
2018-05-10 15:00:30	0.747769	2.58025		0.170925	0.158177	0.0479817	0.0585926		0.427123		0.0326252			0.0181705		0.123394	4.365
2018-05-10 17:00:30	0.825467	2.02924		0.206278	0.188709	0.0312036	0.0843489	0.00911736	0.329598		0.0215171			0.0110887		0.134047	3.87062
2018-05-10 19:00:30	0.750876	1.6838		0.283411	0.21442		0.0998803	0.0438571	0.296006		0.000932147	0.00499734		0.0308433		0.0168668	3.42589
2018-05-10 21:00:30	1.49367	1.75162		0.289839	0.12893	0.0487806	0.0540624	0.0678671	0.317678		0.00427234	0.0163384		0.0381115		0.0901042	4.30127
2018-05-10 23:00:30	0.579939	1.48671		0.135572	0.135679		0.0518621	0.0138666	0.245076		0.00497144	0.0349813		0.031216		0.0967621	2.81664
2018-05-11 01:00:30	0.409003	1.44433		0.233595	0.154962		0.0660992	0.0100848	0.189812		0.00155357			0.01435			2.52379
2018-05-11 03:00:30	0.3686	1.46552		0.127537	0.148535	0.0541068	0.0593689	0.00515964	0.123712		0.00551519			0.0201273		0.0594776	2.43766
2018-05-11 05:00:30	0.65142	1.43161		0.132358	0.126359	0.0634279	0.0685583		0.22557		0.0231482	0.0419724		0.0264636		0.127388	2.91828
2018-05-11 07:00:30	0.775737	1.73678		0.259306	0.206384		0.102339	0.00428015	0.199564		6.89924e-18	0.0039875		0.00668113			3.29506
2018-05-11 09:00:30	0.71047	0.817033		0.241629	0.0832928	0.0341329	0.0387897		0.18331		0.00334018	0.00220089		0.0170522			2.13125
2018-05-11 11:00:30	1.0772	1.012		0.347687	0.114789		0.0654518		0.099872		0.00403928			0.0215249		0.028851	2.77142
2018-05-11 13:00:30	0.940454	3.38553		1.18972	0.3028		0.146733	0.0522119	0.167055		0.00326249			0.0318681		0.0714616	6.2911
2018-05-11 15:00:30	0.676281	3.68222		1.18168	0.325296	0.00044386	0.115282	0.143502	0.0706147		0.000776784	0.0163383		0.0177977		0.0874405	6.31768
2018-05-11 17:00:30	0.405893	2.43188		0.47624	0.182279	0.0210834	0.154498	0.217378	0.0585866			0.00181249		0.00279544		0.136709	4.08915
2018-05-11 19:00:30	0.359274	0.823387		0.244842	0.0497077	0.00763439		0.00920522	0.0879522		0.000699104			0.00635497		0.162009	1.75107
2018-05-11 21:00:30	0.654525	0.658088		0.140392	0.0193367	0.0269423	0.0248113	0.0487818	0.0836177		0.00326248			0.0163067		0.107414	1.78348
2018-05-11 23:00:30	0.785056	0.675041		0.137178	0.0080882	0.0270754			0.0760325			0.00165713		0.0218976		0.0994245	1.83145
2018-05-12 01:00:30	1.09274	0.634775		0.270553	0.0506717	0.022548	0.0648044	0.00014658	0.0738652		0.00108749	0.00181249		0.0164931			2.22949
2018-05-12 03:00:30	0.399676	0.482192		0.0439762	0.0215863	0.0116291	0.0329652		0.0998715					0.00378315		0.0115403	1.10722
2018-05-12 05:00:30	0.226928	0.844769		0.16782	0.0561612	0.0129286	0.0133224		0.0452786		0.00214442	0.00360321		0.0109721		0.0222562	1.40618
2018-05-12 07:00:30	2.28714	2.6137		0.659593	0.501538	0.0510869	0.350102	0.144868	0.12504		0.0100106	0.0146132		0.014783		0.211054	6.98352
2018-05-12 09:00:30	0.983958	3.42789		1.36004	0.33815		0.109457		0.0771158		0.00287408			0.0223634		0.0301823	6.35204
2018-05-12 11:00:30	1.20462	5.84379		2.39329	0.749521	0.0253443	0.197208		0.0666049					0.0138839		0.0488243	10.5431
2018-05-12 13:00:30	1.89146	9.65835		4.22518	1.05644		0.528541	0.0248598	0.117209		0.0164677			0.163998		0.0594769	17.742
2018-05-12 15:00:30	3.60079	14.2994		4.03235	1.60119	0.00643592	0.483241	0.0118436	0.13563		0.00567047			0.089733			24.2663
2018-05-12 17:00:30	2.224	19.7881		3.82344	1.66546	0.0158901	0.443119	0.0340063	0.168137			0.00359906		0.0468698		0.0568136	28.2695
2018-05-12 19:00:30	1.03679	9.36164		1.89514	0.662745		0.151908	0.0431528	0.0814499		0.000699098			0.0157475			13.2493
2018-05-12 21:00:30	0.924904	9.48879		1.73445	0.577579	0.0052375	0.155791	0.0334786	0.0497006		0.0121177			0.0196611			13.0017
2018-05-12 23:00:30	0.943551	10.7179		2.00762	0.635427	0.0101643	0.113209	0.0202865	0.0684467		0.00287407			0.0231087			14.5426
2018-05-13 01:00:30	1.1611	11.2901		2.13618	0.632213	0.0180205	0.137671	0.0425371	0.0634621		0.00567045			0.0264632		0.0395031	15.5529
2018-05-13 03:00:30	1.043	12.053		2.329	0.654709	0.00257436	0.179087	0.0149217	0.0760317		0.00248568			0.0370858			16.3919
2018-05-13 05:00:30	2.00022	12.9007		2.61825	0.661136		0.17391	0.0199346	0.0781988		0.0034178			0.0389493		0.0421662	18.5368
2018-05-13 07:00:30	1.45945	19.7033		3.95198	1.36978		0.39264	0.0406022	0.104205		0.00178658			0.0397879			27.0635
2018-05-13 09:00:30	2.01576	29.0701		6.00882	2.37249		0.670906	0.0485173	0.185474		0.0118846			0.026929			40.4109
2018-05-13 11:00:30	2.55964	28.4343		7.02116	3.04739		0.874105	0.0377878	0.24182		0.000233032			0.0547899		0.0807814	42.352
2018-05-13 13:00:30	1.81996	13.3669		5.04466	1.82614		0.594544	0.0519472	0.255906		0.00116516	0.000880341		0.0185428			22.9806
2018-05-13 15:00:30																	0
2018-05-13 17:00:30	2.60936	13.8966		5.14107	1.72972		0.462529	0.0564324	0.17247		0.000155354			0.00978388			24.0782
2018-05-13 19:00:30	4.56419	10.0397		4.80362	1.33764		0.453469	0.0392828	0.18764					0.049758			21.4753
2018-05-13 21:00:30	1.77023	8.06886		4.06444	1.24604	0.0326675	0.395227	0.0384912	0.171386		0.000155354	0.0124542		0.0233881			15.8233
2018-05-13 23:00:30	1.47809	7.1576		4.25727	1.29586	0.00923212	0.333102	0.0281135	0.111789			0.0043758		0.0125793			14.688
2018-05-14 01:00:30	1.21393	6.71257		4.45009	1.26854		0.347339	0.0376117	0.14538			0.0013464		0.064853			14.2417
2018-05-14 03:00:30	1.18906	5.8437		3.90374	1.26854	0.0104305	0.263212	0.00770996	0.108538		0.00388384	0.0101239		0.0255312		0.0661338	12.7006
2018-05-14 05:00:30	2.31099	5.65297		4.49829	1.34245		0.329219	0.0253871	0.0814489		0.00139818	0.00251155		0.0296311			14.2743
2018-05-14 07:00:30	2.60002	6.73375		6.4587	2.06716		0.557007	0.0472857	0.200642		0.000310707	2.58922e-05		0.0204063			18.6853
2018-05-14 09:00:30	5.99378	8.04763		8.53159	2.91882		0.933634	0.0430643	0.391352					0.101565			26.9614
2018-05-14 11:00:30	3.44535	9.02245		9.8171	4.28467	0.00257433	1.2559	0.0526504	0.597231			0.000414275		0.0481737		0.100754	28.6273
2018-05-14 13:00:30	4.78171	9.02244		10.4759	5.28094	0.011762	1.81113	0.0880926	0.517046		0.00194191			0.04836		0.0102085	32.0496
2018-05-14 15:00:30	3.91152	7.92047		11.0705	4.12398		1.47463	0.0924898	0.472619		0.00209726	2.58921e-05		0.0987699		0.0541496	29.2212
2018-05-14 17:00:30	2.02817	4.27549		8.06557	1.84219	0.0378603	0.637248	0.0252991	0.242901		0.00567037	0.00616232		0.0326127		0.079449	17.2786
2018-05-14 19:00:30	2.41976	3.27948		7.03715	1.31834		0.546651	0.0371718	0.184388					0.0498508			14.8728
2018-05-14 21:00:30	1.77022	2.87684		6.84432	1.26853	0.0137593	0.637247	0.0246834	0.20931			0.00165709		0.012486			13.6591
2018-05-14 23:00:30	3.22779	2.77088		7.19783	1.17372	0.00736788	0.607479	0.025299	0.268906			0.000258921		0.0294445		0.0355079	15.3445
2018-05-15 01:00:30	1.42214	2.60134		7.48707	1.18497		0.52853	0.0197584	0.206059		0.00271867			0.00931788		0.00621387	13.4681
2018-05-15 03:00:30	1.17973	2.43181		7.40672	1.1448		0.567357	0.015625	0.252652		0.00038838	0.00165709		0.024506			13.0252
2018-05-15 05:00:30	1.18594	2.30466		8.2905	1.09177	0.0391917	0.541472	0.0179995	0.217978		0.00800063			0.0344761			13.732
2018-05-15 07:00:30	2.28922	3.9576		11.5525	1.84218	0.0086994	1.24166	0.0279373	0.610229		0.000621408			0.0269286		0.0168662	21.5744
2018-05-15 09:00:30	3.72502	4.84764		13.0629	2.501	0.0160229	1.96643	0.0535294	0.657906		0.000854435	0.00212314		0.0405327			26.874
2018-05-15 11:00:30	5.7451	5.65292		14.011	2.501	0.0130935	2.30293	0.0406014	0.684994		0.00116514			0.0777109		0.00488231	31.0354
2018-05-15 13:00:30	8.97722	6.83964		15.5375	2.30817	0.00856623	2.71708	0.0544088	0.779264			0.00181244		0.103428		0.0874377	37.4145
2018-05-15 15:00:30	4.87491	6.90321		16.7266	1.66542	0.0599636	2.45824	0.0471973	0.864865			0.00297757		0.0675543		0.265864	33.9368
2018-05-15 17:00:30	3.38316	6.24627		18.4941	1.46295	0.019618	2.18644	0.0406013	0.915792		0.00854433	0.00041427		0.0500367		0.0967583	32.9047
2018-05-15 19:00:30	1.8075	3.53375		15.7946	0.771996		1.27918	0.0696232	0.494285		0.000699081			0.0639203			23.8155
2018-05-15 21:00:30	2.2084	2.9192		14.5733	0.62095		1.15752	0.0467574	0.381595		0.00419448	0.000957999		0.0384826		0.0181976	21.9696
2018-05-15 23:00:30	2.4477	2.96158		15.0875	0.547033	0.0113624	1.15752	0.0696231	0.434689					0.0360599		0.15934	22.9124
2018-05-16 01:00:30	2.01572	2.30464		14.9108	0.590418	0.0134929	1.11352	0.0748997	0.366424					0.0417438		0.0568121	21.4884
2018-05-16 03:00:30	3.28991	2.30464		16.4051	0.484364	0.041455	1.30636	0.0548483	0.471529			0.00616225		0.0505025		0.00887688	24.4238
2018-05-16 05:00:30	1.65832	2.34702		16.5658	0.535784	0.00989771	1.17435	0.107439	0.481281		0.00264096			0.0281397		0.0168661	22.9275
2018-05-16 07:00:30	2.05301	3.74565		21.2257	0.845909		2.44528	0.055112	0.735917		0.00668008	0.000258918		0.0449117		0.0541489	31.2126
2018-05-16 09:00:30	3.10344	4.76283		24.7608	1.06444	0.0168216	3.55831	0.0986446	0.835604		0.00209723	0.000336593		0.0627086		0.546814	38.8129
2018-05-16 11:00:30	4.6884	5.80121		25.7249	1.26851	0.0104303	3.53243	0.0493955	0.968881		0.0257105	0.00507478		0.0667152		0.359069	42.5007
2018-05-16 13:00:30	6.61523	6.35218		24.7608	1.36492	0.0486451	4.19248	0.0590694	0.810681			0.00227847		0.0762193		0.484232	44.7667
2018-05-16 15:00:30	5.93151	6.86077		30.3848	1.17853	0.0728789	3.403	0.080176	1.03823		0.00201955	0.00484175		0.0959729		0.372383	49.4251
2018-05-16 17:00:30	8.63527	7.0091		30.5454	1.43884	0.0541043	3.53242	0.0889704	0.919035		0.00264095			0.117404		0.874368	53.2176
2018-05-16 19:00:30	2.38242	3.47015		21.2256	0.63862	0.0549032	1.64285	0.0792965	0.495365					0.0416503		0.297818	30.3287
2018-05-16 21:00:30	2.00327	2.87679		22.6718	0.575952	0.0365281	1.55225	0.0713814	0.449855			0.000336591		0.0448183		0.319122	30.6021
2018-05-16 23:00:30	1.6552	2.47415		22.5111	0.437762	0.0402564	1.40989	0.092488	0.371839		0.000932099			0.0332643		0.0661323	29.093
2018-05-17 01:00:30	1.69249	2.13509		21.0649	0.416873	0.0198841	1.27011	0.0138659	0.307909					0.0501294		0.213931	27.1852
2018-05-17 03:00:30	2.30161	2.26224		22.9931	0.375094	0.0475797	2.03111	0.0555514	0.4271		0.00357304	0.00258916		0.0187286		0.211268	30.7296
2018-05-17 05:00:30	1.88517	2.13509		22.9931	0.481146		1.30635	0.024683	0.238562		0.00372839			0.0350346		0.351077	29.4539
2018-05-17 07:00:30	9.49127	3.64888		28.3714	0.690975	0.0479794	3.09225	0.0781888	0.796728		0.000156655			0.0844701		0.403708	46.706
2018-05-17 09:00:30	3.97358	4.12706		27.9743	0.958381	0.0354628	2.31584	0.0907288	0.848599					0.0668079		0.461593	40.8524
2018-05-17 11:00:30	5.15453	4.80517		24.7606	1.12871	0.0262753	3.07942	0.0907287	0.785753		0.00108744			0.107153		1.31509	41.2545
2018-05-17 13:00:30	5.745	5.39852		22.6717	1.1978	0.0474463	2.80763	0.106559	0.694735		0.00132047			0.143492		0.903655	39.7178
2018-05-17 15:00:30	6.30439	6.11902		17.2084	1.09818	0.0174872	2.30289	0.0880903	0.539787					0.0959721		1.10205	34.8762
2018-05-17 17:00:30	6.55301	5.71638		23.6357	1.1046	0.0868591	3.06647		0.914693		0.00551488			0.106221		1.27515	42.4646
2018-05-17 19:00:30	3.91141	4.02109		19.7793	0.725385	0.0643565	1.77226	0.0854519	0.551705		0.00155349			0.0875861		0.268522	31.2686
2018-05-17 21:00:30	5.46529	3.00391		17.2083	0.490785	0.0570331	1.82402	0.0705014	0.626469		0.00100977	0.00538542		0.0661554		0.626698	29.4456
2018-05-17 23:00:30	2.31714	2.64366		16.8869	0.466682	0.0935165	1.65578	0.0326857	0.341497			0.014784		0.0366184		0.379037	24.8683
2018-05-18 01:00:30	1.76085	2.5377		18.3331	0.48275	0.129467	1.77225	0.0916077	0.435765					0.0518993		0.542812	26.1382
2018-05-18 03:00:30	1.6614	2.68604		17.369	0.381518	0.134793	1.9405	0.0127225	0.456352		0.00225255	0.00018124		0.0448179		0.789141	25.4787
2018-05-18 05:00:30	1.93177	2.49532		18.0117	0.387945	0.136125	1.90167	0.0455253	0.564706		0.00551486			0.0301891		0.923623	26.4341
2018-05-18 07:00:30	3.28985	4.14822		18.6544	0.672356	0.168081	2.21228	0.0740189	0.894102		0.000233022	0.00220076		0.102494		0.581425	30.7997
2018-05-18 09:00:30	4.68833	4.95347		16.2441	0.738236	0.150771	2.72996	0.111834	0.849676		0.000699066	0.00639516		0.109948		0.512186	31.0957
2018-05-18 11:00:30	9.62962	5.99183		16.7262	1.07889	0.197374	3.71356	0.0497465	1.14115		0.000932087	0.000258913		0.141628		0.890333	39.5615
2018-05-18 13:00:30	8.1379	6.60637		12.227	1.31348	0.197373	3.26058	0.0713804	1.01871		0.000466043			0.194738		0.818432	33.8465
2018-05-18 15:00:30	5.4031	5.75872		10.347	1.14958	0.173406	3.09233	0.0388415	0.990534		0.00427206	0.00390958		0.168649		1.04745	28.1778
2018-05-18 17:00:30	2.19281	3.70319		8.7241	0.662713	0.153434	2.45817	0.0722598	0.695811					0.0623347		0.962233	19.6871
2018-05-18 19:00:30	2.42278	3.10984		9.02939	0.522918	0.173406	2.27698	0.0722597	0.595042		0.00116511	0.00227843		0.0737021		0.835739	19.1155
2018-05-18 21:00:30	2.57195	2.58007		7.69572	0.437755	0.12414	1.92755	0.031806	0.475853		0.00225254	0.00220075		0.0486378		0.763838	16.6618
2018-05-18 23:00:30	4.25323	3.4277		8.03315	0.442575	0.1774	2.45817	0.0543193	0.872426					0.0792926		0.758511	20.5568
2018-05-19 01:00:30	4.968	2.66483		8.40271	0.392763	0.224003	2.23815	0.0722596	0.590707		0.00170882			0.0148149		1.1553	20.7252
2018-05-19 03:00:30	2.16173	2.60125		8.14561	0.397583	0.263947	2.43228	0.0406002	0.622129		0.000233021	0.000647279		0.0526442		0.842395	17.5611
2018-05-19 05:00:30	1.95351	2.79197		8.12954	0.400797	0.341174	2.72994	0.0414796	0.686057			0.00336585		0.0500353		1.56806	18.6959
2018-05-19 07:00:30	2.30779	3.97866		8.16167	0.518095	0.234654	2.91113	0.0617063	0.857254		0.00163114			0.0755653		1.26181	20.37
2018-05-19 09:00:30	2.63409	3.6396		8.41876	0.463463	0.169411	3.28644	0.0731388	1.0978		0.00559248			0.0538554		1.76778	21.6099
2018-05-19 11:00:30	3.97351	4.36009		8.69191	0.768759	0.251963	4.11473	0.0942449	1.44453					0.104356		2.00745	25.8115
2018-05-19 13:00:30	5.96244	4.93223		8.01704	1.02264	0.230659	4.56769	0.0766564	1.66123					0.195668		1.80772	28.474
2018-05-19 15:00:30	6.52183	3.80912		6.58696	0.709306	0.193377	3.55822	0.0669827	1.282					0.102493		1.86098	24.6913
2018-05-19 17:00:30	2.63409	3.04625		5.51038	0.492384	0.299896	3.24761	0.0554622	1.14114		0.00233019	0.00530766		0.0732357		1.95419	18.4623
2018-05-19 19:00:30	2.46938	2.94029		4.81945	0.436145	0.216012	2.97583	0.0608266	1.09779					0.0906594		1.40827	16.5147
2018-05-19 21:00:30	2.08091	2.32576		4.59449	0.402401	0.218675	2.63933	0.0369943	0.848582			0.000181237		0.0679246		1.35501	14.5703
2018-05-19 23:00:30	2.21454	2.28337		4.57842	0.407222	0.208023	2.62639	0.0696208	0.826911			0.00251143		0.0726765		1.28844	14.5781
2018-05-20 01:00:30	2.58746	2.62242		4.48201	0.365444	0.177399	3.33819	0.0546706	1.07612		0.00489339	0.00025891		0.0854414		1.95418	16.7485
2018-05-20 03:00:30	2.63719	2.2198		4.36952	0.384726	0.209354	2.65227	0.0347957	0.977519					0.0969019		1.19523	14.7773
2018-05-20 05:00:30	4.0978	2.19861		4.40166	0.350982	0.192045	2.4452	0.0124584	0.741311		0.00287389			0.0787327		1.15529	15.6769
2018-05-20 07:00:30	2.71177	2.64361		4.49806	0.463459	0.186719	3.24759	0.0564293	1.01436		0.00233018	0.00934662		0.0854412		1.40827	16.3274
2018-05-20 09:00:30	3.25872	3.38528		4.69088	0.654669	0.299895	4.46413	0.0731382	2.1163			0.00336582		0.245049		1.54142	20.7328
2018-05-20 11:00:30	5.77594	4.10576		4.16063	0.931041	0.138785	4.51589	0.0836911	2.26799		0.00535941			0.27207		1.60799	23.8651
2018-05-20 13:00:30	7.98239	4.80505		3.69465	1.00656	0.118813	4.34764	0.0661028	2.1163		0.000388363			0.358722		1.36832	25.8649
2018-05-20 15:00:30	8.97684	4.97457		3.01979	0.897296	0.153431	3.35112	0.0669821	1.68289		0.0102528	0.000802616		0.302817		1.12865	24.5654
2018-05-20 17:00:30	5.68269	3.53361		2.76269	0.519696	0.102835	2.32871	0.0617056	1.1953		0.00466035			0.125785		0.762495	17.0802
2018-05-20 19:00:30	2.04671	2.36812		2.52167	0.317237	0.0746073	1.90163	0.0272325	0.884331					0.0899132		0.416309	10.6478
2018-05-20 21:00:30	1.9193	2.15621		2.26458	0.27064	0.0603604	1.73339	0.0506249	0.812819		0.00621379			0.0583271		0.465574	9.79804
2018-05-20 23:00:30	2.08089	1.89557		2.28065	0.207974	0.0794005	1.33219	0.0239787	0.576611			0.000181235		0.0563704		0.413646	8.94746
average value	2.53598	4.41067		7.45002	0.754784	0.0770408	1.28394	0.0492079	0.477799		0.00412909	0.00584022		0.0563634		0.517503	17.6233

## Sheet: Meteorological factors
date	time	temperature（℃）	Relative humidity	Wind direction (angle measured in a clockwise direction, between true north and the wind blowing direction) /degrees	Wind speed（m/s）
2018-05-08	00:00:00	24.6	88	320	2
2018-05-08 01:00:00	01:00:00	26	88	30	4
2018-05-08 01:59:59	02:00:00	25	94	50	5
2018-05-08 02:59:59	03:00:00	27.6	88	340	2
2018-05-08 03:59:59	04:00:00	25	88	80	6
2018-05-08 04:59:59	05:00:00	24	88	70	5
2018-05-08 05:59:59	06:00:00	30.1	88	290	5
2018-05-08 06:59:59	07:00:00	24	89	70	5
2018-05-08 07:59:59	08:00:00	24	78	70	5
2018-05-08 08:59:59	09:00:00	24.5	78	160	5
2018-05-08 09:59:59	10:00:00	23	78	60	6
2018-05-08 10:59:59	11:00:00	23	74	50	6
2018-05-08 11:59:59	12:00:00	22.6	78	70	2
2018-05-08 12:59:59	13:00:00	22	83	40	6
2018-05-08 13:59:59	14:00:00	22	78	40	6
2018-05-08 14:59:59	15:00:00	21.6	78	40	1
2018-05-08 15:59:59	16:00:00	21	78	40	5
2018-05-08 16:59:59	17:00:00	22	83	40	6
2018-05-08 17:59:59	18:00:00	20.8	83	70	3
2018-05-08 18:59:59	19:00:00	21	83	40	5
2018-05-08 19:59:59	20:00:00	21	78	40	5
2018-05-08 20:59:59	21:00:00	20.9	83	70	2
2018-05-08 21:59:59	22:00:00	21	83	40	6
2018-05-08 22:59:59	23:00:00	22	78	50	7
2018-05-08 23:59:59	1900-01-01	21.3	83	90	2
2018-05-09 00:59:59	1900-01-01 01:00:00	22	73	40	8
2018-05-09 01:59:59	1900-01-01 02:00:00	23	78	50	7
2018-05-09 02:59:59	1900-01-01 03:00:00	23.8	78	110	4
2018-05-09 03:59:59	1900-01-01 04:00:00	24	78	60	7
2018-05-09 04:59:59	1900-01-01 05:00:00	24	78	60	8
2018-05-09 05:59:59	1900-01-01 06:00:00	24	78	90	4
2018-05-09 06:59:59	1900-01-01 07:00:00	24	73	60	9
2018-05-09 07:59:59	1900-01-01 08:00:00	23	65	60	8
2018-05-09 08:59:59	1900-01-01 09:00:00	22.1	73	140	2
2018-05-09 09:59:59	1900-01-01 10:00:00	21	69	50	7
2018-05-09 10:59:59	1900-01-01 11:00:00	21	65	40	7
2018-05-09 11:59:59	1900-01-01 12:00:00	18.9	65	70	2
2018-05-09 12:59:59	1900-01-01 13:00:00	20	61	40	7
2018-05-09 13:59:59	1900-01-01 14:00:00	20	57	40	8
2018-05-09 14:59:59	1900-01-01 15:00:00	18.6	53	20	1
2018-05-09 15:59:59	1900-01-01 16:00:00	19	47	30	7
2018-05-09 16:59:59	1900-01-01 17:00:00	20	60	40	7
2018-05-09 17:59:59	1900-01-01 18:00:00	17.9	64	40	3
2018-05-09 18:59:59	1900-01-01 19:00:00	19	64	40	8
2018-05-09 19:59:59	1900-01-01 20:00:00	19	73	30	6
2018-05-09 20:59:59	1900-01-01 21:00:00	18	73	40	2
2018-05-09 21:59:59	1900-01-01 22:00:00	19	68	30	6
2018-05-09 22:59:59	1900-01-01 23:00:00	20	68	30	8
2018-05-09 23:59:59	1900-01-02	18.7	73	40	3
2018-05-10 00:59:59	1900-01-02 01:00:00	21	64	30	9
2018-05-10 01:59:59	1900-01-02 02:00:00	22	73	40	9
2018-05-10 02:59:59	1900-01-02 03:00:00	21.3	68	70	3
2018-05-10 03:59:59	1900-01-02 04:00:00	23	73	50	9
2018-05-10 04:59:59	1900-01-02 05:00:00	23	73	40	9
2018-05-10 05:59:59	1900-01-02 06:00:00	22.2	73	110	3
2018-05-10 06:59:59	1900-01-02 07:00:00	21	64	40	9
2018-05-10 07:59:59	1900-01-02 08:00:00	21	64	40	8
2018-05-10 08:59:59	1900-01-02 09:00:00	20.3	60	140	3
2018-05-10 09:59:59	1900-01-02 10:00:00	20	60	50	7
2018-05-10 10:59:59	1900-01-02 11:00:00	20	60	40	7
2018-05-10 11:59:59	1900-01-02 12:00:00	19.1	57	90	3
2018-05-10 12:59:59	1900-01-02 13:00:00	20	60	40	6
2018-05-10 13:59:59	1900-01-02 14:00:00	20	64	40	5
2018-05-10 14:59:59	1900-01-02 15:00:00	18.5	64	360	2
2018-05-10 15:59:59	1900-01-02 16:00:00	20	64	30	4
2018-05-10 16:59:59	1900-01-02 17:00:00	19	68	30	5
2018-05-10 17:59:59	1900-01-02 18:00:00	18.1	73	20	2
2018-05-10 18:59:59	1900-01-02 19:00:00	19	73	20	4
2018-05-10 19:59:59	1900-01-02 20:00:00	19	78	10	3
2018-05-10 21:00:00	1900-01-02 21:00:00	17.8	78	360	1
2018-05-10 21:59:59	1900-01-02 22:00:00	19	78	360	3
2018-05-10 22:59:59	1900-01-02 23:00:00	20	78	350	3
2018-05-11	1900-01-03	18.5	78	320	2
2018-05-11 01:00:00	1900-01-03 01:00:00	21	83	330	2
2018-05-11 01:59:59	1900-01-03 02:00:00	22	83	340	2
2018-05-11 02:59:59	1900-01-03 03:00:00	17	83	290	3
2018-05-11 03:59:59	1900-01-03 04:00:00	20	83	280	4
2018-05-11 04:59:59	1900-01-03 05:00:00	21	78	290	3
2018-05-11 05:59:59	1900-01-03 06:00:00	23.1	78	290	2
2018-05-11 06:59:59	1900-01-03 07:00:00	26	68	110	3
2018-05-11 07:59:59	1900-01-03 08:00:00	25	68	100	3
2018-05-11 08:59:59	1900-01-03 09:00:00	23.5	64	220	1
2018-05-11 09:59:59	1900-01-03 10:00:00	23	60	90	2
2018-05-11 10:59:59	1900-01-03 11:00:00	21	64	80	2
2018-05-11 11:59:59	1900-01-03 12:00:00	21.6	78	290	2
2018-05-11 12:59:59	1900-01-03 13:00:00	20.1	73		1
2018-05-11 13:59:59	1900-01-03 14:00:00	20	69	0	0
2018-05-11 14:59:59	1900-01-03 15:00:00	21.3	61	160	1
2018-05-11 15:59:59	1900-01-03 16:00:00	20	61	20	1
2018-05-11 16:59:59	1900-01-03 17:00:00	20	65	320	1
2018-05-11 17:59:59	1900-01-03 18:00:00	19.8	73	320	1
2018-05-11 18:59:59	1900-01-03 19:00:00	19	83	280	1
2018-05-11 19:59:59	1900-01-03 20:00:00	19	83	0	0
2018-05-11 20:59:59	1900-01-03 21:00:00	18.9	83	320	2
2018-05-11 21:59:59	1900-01-03 22:00:00	19	88	0	0
2018-05-11 22:59:59	1900-01-03 23:00:00	22	88		1
2018-05-11 23:59:59	1900-01-04	22.7	88	290	2
2018-05-12 00:59:59	1900-01-04 01:00:00	25	88	180	3
2018-05-12 01:59:59	1900-01-04 02:00:00	26	88	170	5
2018-05-12 02:59:59	1900-01-04 03:00:00	27.7	94	200	2
2018-05-12 03:59:59	1900-01-04 04:00:00	29	94	170	7
2018-05-12 04:59:59	1900-01-04 05:00:00	29	94	170	8
2018-05-12 05:59:59	1900-01-04 06:00:00	31.3	100	180	1
2018-05-12 06:59:59	1900-01-04 07:00:00	28	88	170	8
2018-05-12 07:59:59	1900-01-04 08:00:00	27	73	170	8
2018-05-12 08:59:59	1900-01-04 09:00:00	28.5	69	160	6
2018-05-12 09:59:59	1900-01-04 10:00:00	26	69	200	7
2018-05-12 10:59:59	1900-01-04 11:00:00	25	65	200	6
2018-05-12 11:59:59	1900-01-04 12:00:00	24.7	55	200	4
2018-05-12 12:59:59	1900-01-04 13:00:00	24	58	200	3
2018-05-12 13:59:59	1900-01-04 14:00:00	24	62	200	2
2018-05-12 14:59:59	1900-01-04 15:00:00	24.3	62	290	2
2018-05-12 15:59:59	1900-01-04 16:00:00	23	65	210	2
2018-05-12 16:59:59	1900-01-04 17:00:00	23	69	190	3
2018-05-12 17:59:59	1900-01-04 18:00:00	23.3	69	270	1
2018-05-12 18:59:59	1900-01-04 19:00:00	23	78	220	2
2018-05-12 19:59:59	1900-01-04 20:00:00	23	83	220	2
2018-05-12 20:59:59	1900-01-04 21:00:00	22.3	83	290	1
2018-05-12 21:59:59	1900-01-04 22:00:00	23	83	230	2
2018-05-12 22:59:59	1900-01-04 23:00:00	26	83	240	3
2018-05-12 23:59:59	1900-01-05	25.4	88	190	3
2018-05-13 00:59:59	1900-01-05 01:00:00	27	88	190	5
2018-05-13 01:59:59	1900-01-05 02:00:00	28	88	180	6
2018-05-13 02:59:59	1900-01-05 03:00:00	30.4	88	290	1
2018-05-13 03:59:59	1900-01-05 04:00:00	29	88	180	8
2018-05-13 04:59:59	1900-01-05 05:00:00	29	88	170	8
2018-05-13 05:59:59	1900-01-05 06:00:00	34.3	94	270	3
2018-05-13 06:59:59	1900-01-05 07:00:00	28	78	170	8
2018-05-13 07:59:59	1900-01-05 08:00:00	26	74	180	9
2018-05-13 08:59:59	1900-01-05 09:00:00	29.4	74	140	5
2018-05-13 09:59:59	1900-01-05 10:00:00	26	74	190	7
2018-05-13 10:59:59	1900-01-05 11:00:00	25	70	190	5
2018-05-13 11:59:59	1900-01-05 12:00:00	26.9	70	140	4
2018-05-13 12:59:59	1900-01-05 13:00:00	25	70	170	2
2018-05-13 13:59:59	1900-01-05 14:00:00	25	70	190	2
2018-05-13 14:59:59	1900-01-05 15:00:00	25.8	74	180	2
2018-05-13 15:59:59	1900-01-05 16:00:00	24	83		1
2018-05-13 16:59:59	1900-01-05 17:00:00	24	83		1
2018-05-13 17:59:59	1900-01-05 18:00:00	25	83	200	1
2018-05-13 18:59:59	1900-01-05 19:00:00	23	89	30	2
2018-05-13 19:59:59	1900-01-05 20:00:00	24	89	20	3
2018-05-13 20:59:59	1900-01-05 21:00:00	24.6	89	220	2
2018-05-13 21:59:59	1900-01-05 22:00:00	24	89	30	2
2018-05-13 22:59:59	1900-01-05 23:00:00	24	94	30	2
2018-05-13 23:59:59	1900-01-06	25.4	94	160	1
2018-05-14 00:59:59	1900-01-06 01:00:00	26	94	70	2
2018-05-14 01:59:59	1900-01-06 02:00:00	27	94	90	2
2018-05-14 02:59:59	1900-01-06 03:00:00	29.2	94	140	4
2018-05-14 03:59:59	1900-01-06 04:00:00	28	94	180	4
2018-05-14 04:59:59	1900-01-06 05:00:00	28	94	160	4
2018-05-14 05:59:59	1900-01-06 06:00:00	29.9	94	140	3
2018-05-14 06:59:59	1900-01-06 07:00:00	29	94	170	7
2018-05-14 07:59:59	1900-01-06 08:00:00	29	94	180	7
2018-05-14 08:59:59	1900-01-06 09:00:00	27.5	83	160	5
2018-05-14 09:59:59	1900-01-06 10:00:00	26	84	190	6
2018-05-14 10:59:59	1900-01-06 11:00:00	25	83	200	5
2018-05-14 11:59:59	1900-01-06 12:00:00	26.4	74	140	3
2018-05-14 12:59:59	1900-01-06 13:00:00	25	74	190	3
2018-05-14 13:59:59	1900-01-06 14:00:00	24	70	180	2
2018-05-14 14:59:59	1900-01-06 15:00:00	25.2	70	160	1
2018-05-14 15:59:59	1900-01-06 16:00:00	24	70	150	2
2018-05-14 16:59:59	1900-01-06 17:00:00	24	74	190	3
2018-05-14 17:59:59	1900-01-06 18:00:00	24.6	83	140	2
2018-05-14 18:59:59	1900-01-06 19:00:00	24	89	190	4
2018-05-14 19:59:59	1900-01-06 20:00:00	24	83	180	5
2018-05-14 20:59:59	1900-01-06 21:00:00	23.8	89	160	2
2018-05-14 21:59:59	1900-01-06 22:00:00	24	94		1
2018-05-14 22:59:59	1900-01-06 23:00:00	26	94	200	3
2018-05-14 23:59:59	1900-01-07	27.5	94	160	2
2018-05-15 00:59:59	1900-01-07 01:00:00	28	94	180	5
2018-05-15 01:59:59	1900-01-07 02:00:00	30	94	180	7
2018-05-15 02:59:59	1900-01-07 03:00:00	31.2	94	110	2
2018-05-15 03:59:59	1900-01-07 04:00:00	31	94	190	7
2018-05-15 04:59:59	1900-01-07 05:00:00	31	94	180	8
2018-05-15 05:59:59	1900-01-07 06:00:00	32.4	94	160	2
2018-05-15 06:59:59	1900-01-07 07:00:00	31	83	180	8
2018-05-15 07:59:59	1900-01-07 08:00:00	31	74	190	8
2018-05-15 08:59:59	1900-01-07 09:00:00	31.4	74	140	5
2018-05-15 09:59:59	1900-01-07 10:00:00	28	66	190	7
2018-05-15 10:59:59	1900-01-07 11:00:00	27	66	190	4
2018-05-15 11:59:59	1900-01-07 12:00:00	28.7	58	160	3
2018-05-15 12:59:59	1900-01-07 13:00:00	27	62	190	4
2018-05-15 13:59:59	1900-01-07 14:00:00	26	62	200	5
2018-05-15 14:59:59	1900-01-07 15:00:00	27.3	62	140	2
2018-05-15 15:59:59	1900-01-07 16:00:00	25	58	200	4
2018-05-15 16:59:59	1900-01-07 17:00:00	25	62	210	3
2018-05-15 17:59:59	1900-01-07 18:00:00	26	70	160	2
2018-05-15 18:59:59	1900-01-07 19:00:00	25	74	200	3
2018-05-15 19:59:59	1900-01-07 20:00:00	27	74	240	4
2018-05-15 20:59:59	1900-01-07 21:00:00	25.2	79	320	1
2018-05-15 21:59:59	1900-01-07 22:00:00	26	83	170	4
2018-05-15 22:59:59	1900-01-07 23:00:00	26	83	190	4
2018-05-16 23:59:59	1900-01-08	27.7	89	220	1
2018-05-16 00:59:59	1900-01-08 01:00:00	29	89	180	6
2018-05-16 01:59:59	1900-01-08 02:00:00	30	89	190	7
2018-05-16 02:59:59	1900-01-08 03:00:00	32.8	89	140	3
2018-05-16 03:59:59	1900-01-08 04:00:00	32	74	180	8
2018-05-16 04:59:59	1900-01-08 05:00:00	32	78	180	9
2018-05-16 05:59:59	1900-01-08 06:00:00	35.1	83	140	3
2018-05-16 06:59:59	1900-01-08 07:00:00	32	83	190	10
2018-05-16 07:59:59	1900-01-08 08:00:00	31	74	200	8
2018-05-16 08:59:59	1900-01-08 09:00:00	33.6	70	140	6
2018-05-16 09:59:59	1900-01-08 10:00:00	29	66	200	7
2018-05-16 10:59:59	1900-01-08 11:00:00	27	62	200	8
2018-05-16 11:59:59	1900-01-08 12:00:00	28.8	59	140	5
2018-05-16 12:59:59	1900-01-08 13:00:00	27	59	210	7
2018-05-16 13:59:59	1900-01-08 14:00:00	26	59	180	6
2018-05-16 14:59:59	1900-01-08 15:00:00	27.3	59	140	4
2018-05-16 15:59:59	1900-01-08 16:00:00	26	62	190	5
2018-05-16 16:59:59	1900-01-08 17:00:00	26	66	190	5
2018-05-16 17:59:59	1900-01-08 18:00:00	26.5	70	140	2
2018-05-16 18:59:59	1900-01-08 19:00:00	25	79	160	2
2018-05-16 19:59:59	1900-01-08 20:00:00	25	79	230	2
2018-05-16 20:59:59	1900-01-08 21:00:00	25.6	74	160	2
2018-05-16 21:59:59	1900-01-08 22:00:00	25	83	220	2
2018-05-16 22:59:59	1900-01-08 23:00:00	27	83	180	4
2018-05-16 23:59:59	1900-01-09	29.1	83	160	1
2018-05-17 00:59:59	1900-01-09 01:00:00	29	78	190	6
2018-05-17 01:59:59	1900-01-09 02:00:00	30	74	180	7
2018-05-17 02:59:59	1900-01-09 03:00:00	32.8	83	290	1
2018-05-17 03:59:59	1900-01-09 04:00:00	30	83	180	9
2018-05-17 04:59:59	1900-01-09 05:00:00	32	89	190	9
2018-05-17 05:59:59	1900-01-09 06:00:00	35	89	160	7
2018-05-17 06:59:59	1900-01-09 07:00:00	31	79	190	9
2018-05-17 07:59:59	1900-01-09 08:00:00	31	79	190	8
2018-05-17 08:59:59	1900-01-09 09:00:00	32.6	74	160	7
2018-05-17 09:59:59	1900-01-09 10:00:00	28	70	170	5
2018-05-17 10:59:59	1900-01-09 11:00:00	27	70	190	5
2018-05-17 11:59:59	1900-01-09 12:00:00	29.2	66	160	3
2018-05-17 12:59:59	1900-01-09 13:00:00	26	59	210	3
2018-05-17 13:59:59	1900-01-09 14:00:00	26	59	210	4
2018-05-17 14:59:59	1900-01-09 15:00:00	28.1	58	140	2
2018-05-17 15:59:59	1900-01-09 16:00:00	26	58	200	4
2018-05-17 16:59:59	1900-01-09 17:00:00	26	66	190	4
2018-05-17 17:59:59	1900-01-09 18:00:00	27.8	74	250	2
2018-05-17 18:59:59	1900-01-09 19:00:00	25	79	200	4
2018-05-17 19:59:59	1900-01-09 20:00:00	25	83	200	4
2018-05-17 20:59:59	1900-01-09 21:00:00	26	83	160	2
2018-05-17 21:59:59	1900-01-09 22:00:00	25	83	210	2
2018-05-17 22:59:59	1900-01-09 23:00:00	28	89	240	4
2018-05-17 23:59:59	1900-01-10	29.2	89	320	3
2018-05-18 00:59:59	1900-01-10 01:00:00	30	89	180	6
2018-05-18 01:59:59	1900-01-10 02:00:00	30	94	180	7
2018-05-18 02:59:59	1900-01-10 03:00:00	33.5	94	270	3
2018-05-18 03:59:59	1900-01-10 04:00:00	30	94	180	9
2018-05-18 04:59:59	1900-01-10 05:00:00	31	94	180	9
2018-05-18 05:59:59	1900-01-10 06:00:00	35.8	94	160	4
2018-05-18 06:59:59	1900-01-10 07:00:00	31	79	190	8
2018-05-18 07:59:59	1900-01-10 08:00:00	30	70	190	7
2018-05-18 08:59:59	1900-01-10 09:00:00	29.1	70	180	1
2018-05-18 09:59:59	1900-01-10 10:00:00	27	70	190	6
2018-05-18 10:59:59	1900-01-10 11:00:00	27	70	190	6
2018-05-18 11:59:59	1900-01-10 12:00:00	28.8	70	160	2
2018-05-18 12:59:59	1900-01-10 13:00:00	26	66	190	4
2018-05-18 13:59:59	1900-01-10 14:00:00	26	74	190	3
2018-05-18 14:59:59	1900-01-10 15:00:00	27.9	70	160	1
2018-05-18 15:59:59	1900-01-10 16:00:00	26	70	200	3
2018-05-18 16:59:59	1900-01-10 17:00:00	26	74	180	2
2018-05-18 17:59:59	1900-01-10 18:00:00	26.9	84	160	2
2018-05-18 18:59:59	1900-01-10 19:00:00	25	84	190	3
2018-05-18 19:59:59	1900-01-10 20:00:00	25	84		1
2018-05-18 20:59:59	1900-01-10 21:00:00	26.4	89	250	1
2018-05-18 21:59:59	1900-01-10 22:00:00	25	89		1
2018-05-18 22:59:59	1900-01-10 23:00:00	26	89	180	2
2018-05-18 23:59:59	1900-01-11	27.6	89	220	2
2018-05-19 00:59:59	1900-01-11 01:00:00	26	89	60	3
2018-05-19 01:59:59	1900-01-11 02:00:00	26	94	80	2
2018-05-19 02:59:59	1900-01-11 03:00:00	27.8	94	160	3
2018-05-19 03:59:59	1900-01-11 04:00:00	27	94	190	2
2018-05-19 04:59:59	1900-01-11 05:00:00	27	94		1
2018-05-19 05:59:59	1900-01-11 06:00:00	28.6	100	160	3
2018-05-19 06:59:59	1900-01-11 07:00:00	27	94	190	4
2018-05-19 07:59:59	1900-01-11 08:00:00	27	89	160	2
2018-05-19 08:59:58	1900-01-11 09:00:00	27.8	89	160	4
2018-05-19 09:59:58	1900-01-11 10:00:00	26	94	360	2
2018-05-19 10:59:58	1900-01-11 11:00:00	26	89	40	4
2018-05-19 11:59:58	1900-01-11 12:00:00	27	84	160	3
2018-05-19 12:59:58	1900-01-11 13:00:00	25	84	350	1
2018-05-19 13:59:58	1900-01-11 14:00:00	25	84	30	3
2018-05-19 14:59:58	1900-01-11 15:00:00	26.7	89	110	3
2018-05-19 15:59:58	1900-01-11 16:00:00	25	89	40	6
2018-05-19 16:59:58	1900-01-11 17:00:00	25	89	10	2
2018-05-19 17:59:58	1900-01-11 18:00:00	25.3	94	160	2
2018-05-19 18:59:58	1900-01-11 19:00:00	24	89	40	2
2018-05-19 19:59:58	1900-01-11 20:00:00	24	94	50	3
2018-05-19 20:59:58	1900-01-11 21:00:00	25.1	94	160	2
2018-05-19 21:59:58	1900-01-11 22:00:00	24	94		1
2018-05-19 22:59:58	1900-01-11 23:00:00	25	94		1
2018-05-20 23:59:59	1900-01-12	26.9	94	160	1
2018-05-20 00:59:58	1900-01-12 01:00:00	28	94	100	2
2018-05-20 01:59:58	1900-01-12 02:00:00	28	94	150	2
2018-05-20 02:59:58	1900-01-12 03:00:00	30.5	100	160	1
2018-05-20 03:59:58	1900-01-12 04:00:00	29	100	150	4
2018-05-20 04:59:58	1900-01-12 05:00:00	30	100	170	7
2018-05-20 05:59:58	1900-01-12 06:00:00	32.6	100	140	4
2018-05-20 06:59:58	1900-01-12 07:00:00	31	94	170	8
2018-05-20 07:59:58	1900-01-12 08:00:00	29	100	180	7
2018-05-20 08:59:58	1900-01-12 09:00:00	30.7	89	140	5
2018-05-20 09:59:58	1900-01-12 10:00:00	29	84	60	4
2018-05-20 10:59:58	1900-01-12 11:00:00	27	84	30	6
2018-05-20 11:59:58	1900-01-12 12:00:00	23.4	79	180	3
2018-05-20 12:59:58	1900-01-12 13:00:00	23	74	280	3
2018-05-20 13:59:58	1900-01-12 14:00:00	23	76		1
2018-05-20 14:59:58	1900-01-12 15:00:00	23.1	66	290	2
2018-05-20 15:59:58	1900-01-12 16:00:00	24	74	320	2
2018-05-20 16:59:58	1900-01-12 17:00:00	24	79	30	3
2018-05-20 17:59:58	1900-01-12 18:00:00	23.2	74	290	2
2018-05-20 18:59:58	1900-01-12 19:00:00	24	74		1
2018-05-20 19:59:58	1900-01-12 20:00:00	24	88		1
2018-05-20 20:59:58	1900-01-12 21:00:00	22.3	94	290	2
2018-05-20 21:59:58	1900-01-12 22:00:00	24	94	80	1
2018-05-20 22:59:58	1900-01-12 23:00:00	24	94	50	4

## Sheet: PM2.5,PM10,SO2,O3,CO,NO2
time	PM2.5(μg/m3)	PM10(μg/m3)	SO2(ppb	O3(ppb)	CO(ppm)	NO2(42i)(ppb)
2018-05-08 01	25.1042	27.7257	0.853616	5.27792	0.7391	20.2796
2018-05-08 02	22.3936	26.0898	0.88136	2.55212	0.757891	20.7868
2018-05-08 03	22.7977	27.7262	0.926058	3.83049	0.747452	18.3279
2018-05-08 04	17.863	24.7707	0.919502	7.1085	0.740486	14.2527
2018-05-08 05	16.2807	23.143	0.915154	6.99439	0.748555	12.5199
2018-05-08 06	19.4493	25.7167	1.00052	7.25601	0.777878	12.4992
2018-05-08 07	16.9955	25.928	1.07515	9.49627	0.828205	13.1294
2018-05-08 08	9.96333	22.0227	1.27522	18.517	0.789769	9.76916
2018-05-08 09	6.32649	20.9253	1.34161	32.0191	0.747512	7.54537
2018-05-08 10	4.67333	18.0012	1.33115	41.9765	0.762545	5.72427
2018-05-08 11	4.39	17.8015	1.20942	45.2798	0.759389	5.38993
2018-05-08 12	4.04767	16.1747	1.42066	48.4365	0.739638	4.94463
2018-05-08 13	3.97417	15.6108	1.28006	45.4961	0.729257	4.78287
2018-05-08 14	8.4535	24.2845	1.18598	55.4059	0.782738	9.3588
2018-05-08 15	12.7298	31.4395	1.15868	58.3992	0.824052	11.5291
2018-05-08 16	14.8908	35.1873	0.969578	55.9339	0.826783	12.0657
2018-05-08 17	16.9135	36.305	0.941745	52.8323	0.828574	11.8114
2018-05-08 18	16.0077	33.7567	0.881565	50.7104	0.822474	8.75056
2018-05-08 19	17.9572	36.1308	0.869175	56.4598	0.831319	9.6099
2018-05-08 20	13.1443	27.839	0.779338	56.6788	0.822998	8.96483
2018-05-08 21	15.4332	28.5452	0.722992	56.0213	0.787776	8.43172
2018-05-08 22	15.0958	26.996	0.751669	56.9612	0.761082	7.61898
2018-05-08 23	13.7337	24.7725	0.81523	59.7728	0.740819	5.87299
2018-05-09 00	17.4385	26.674	0.743639	57.7373	0.729227	5.59387
2018-05-09 01	24.2557	31.626	0.69696	55.9031	0.726503	5.38124
2018-05-09 02	22.8818	31.0557	0.706657	53.1765	0.739418	4.62147
2018-05-09 03	21.8125	30.966	0.757129	51.2723	0.739973	5.19962
2018-05-09 04	18.1822	28.4945	0.799501	49.3616	0.717428	5.12322
2018-05-09 05	17.7995	27.7677	0.754	48.3226	0.7254	5.08876
2018-05-09 06	16.8878	26.4458	0.769187	48.0315	0.717747	6.40608
2018-05-09 07	15.9612	25.9217	0.801051	46.3701	0.721826	8.12004
2018-05-09 08	13.448	24.3738	1	49.8166	0.700495	7.78827
2018-05-09 09	14.0788	27.744	0.972223	51.4589	0.714992	8.52734
2018-05-09 10	14.8943	31.2942	1.10345	60.9376	0.704043	8.36394
2018-05-09 11	13.6477	30.6302	1.21378	65.7727	0.68726	7.63679
2018-05-09 12	12.5733	30.3782	0	66.6304	0.686163	6.98122
2018-05-09 13	15.4255	35.1393	0	65.9126	0	0
2018-05-09 14	21.2257	44.1588	1.36444	0	0.61094	7.88296
2018-05-09 15	20.9097	45.522	1.46244	70.9016	0.621742	8.10082
2018-05-09 16	21.6282	47.8676	1.18759	65.9719	0.596433	8.6575
2018-05-09 17	21.1828	47.4187	1.21464	66.5941	0.571169	8.82631
2018-05-09 18	16.5202	39.6583	1.22172	68.5905	0.524546	7.16508
2018-05-09 19	17.5695	40.4324	1.2491	65.6159	0.515249	6.99643
2018-05-09 20	18.5093	41.7172	1.18443	62.5996	0.515471	7.05394
2018-05-09 21	14.459	36.8015	1.25013	59.1992	0.494794	7.23728
2018-05-09 22	12.8652	36.4512	1.31715	59.4952	0.494087	6.08293
2018-05-09 23	12.6013	35.6403	1.20633	61.4627	0.488019	4.37449
2018-05-10 00	13.8563	37.236	1.09525	57.4848	0.487236	5.8053
2018-05-10 01	14.2533	37.7683	1.06279	58.8808	0.496019	4.56264
2018-05-10 02	15.3167	40.5543	0.942789	61.1497	0.50404	4.10974
2018-05-10 03	18.2938	43.8507	0.902852	60.3023	0.503666	4.23049
2018-05-10 04	18.7072	44.0355	0.870108	58.7881	0.496138	4.49369
2018-05-10 05	19.9552	43.5955	0.862712	56.5929	0.500316	4.28912
2018-05-10 06	17.638	41.4537	0.886075	56.264	0.499766	4.53079
2018-05-10 07	15.4103	38.6873	0.889309	56.5508	0.510019	5.28339
2018-05-10 08	14.1337	37.397	0.821873	56.6538	0.507142	5.49731
2018-05-10 09	13.492	35.968	0.849851	57.4921	0.486844	6.73162
2018-05-10 10	14.0129	36.1445	0.906646	58.8414	0.490869	5.75516
2018-05-10 11	12.77	34.8347	0.99207	60.3737	0.505825	5.08948
2018-05-10 12	11.0714	31.9482	0.960877	59.1351	0.4813	4.10858
2018-05-10 13	11.3384	33.1822	0.89699	57.0381	0.478344	5.22194
2018-05-10 14	12.1534	33.9172	0.929834	54.2393	0.474123	5.65092
2018-05-10 15	13.7361	35.7355	0.926687	52.5703	0.493983	5.35313
2018-05-10 16	14.0689	36.4093	0.909985	52.7784	0.500644	5.00244
2018-05-10 17	13.7525	38.6732	1.06491	49.4873	0.496167	6.66549
2018-05-10 18	13.8166	38.9947	0.915999	49.0768	0.495951	5.78817
2018-05-10 19	15.1273	40.2761	0.939531	47.2903	0.510789	6.55027
2018-05-10 20	15.9285	41.281	0.944175	48.5428	0.512625	6.7102
2018-05-10 21	17.1108	42.864	1.02827	48.2812	0.504783	6.55617
2018-05-10 22	16.7558	41.5692	0.984846	50.2641	0.495061	4.77913
2018-05-10 23	17.5237	42.4547	1.02048	48.7113	0.490976	4.99524
2018-05-11 00	18.6467	44.208	1.07414	45.3653	0.502774	5.80536
2018-05-11 01	16.2492	41.5385	0.981792	50.5968	0.49148	3.04771
2018-05-11 02	15.7877	40.511	0.914426	51.2941	0.495532	2.53124
2018-05-11 03	14.6977	40.0115	0.896349	52.2424	0.493336	2.1466
2018-05-11 04	15.7018	39.8907	0.883732	52.4942	0.524174	1.63635
2018-05-11 05	16.877	40.6427	1.0007	50.3633	0.711053	3.32095
2018-05-11 06	15.7992	40.8803	1.2256	45.0271	0.825758	6.50834
2018-05-11 07	13.5712	39.3102	1.16607	43.823	0.713464	8.86657
2018-05-11 08	11.7488	37.1032	1.07997	40.947	0.710867	12.4081
2018-05-11 09	15.6212	43.5918	1.17511	37.3107	0.786143	13.0943
2018-05-11 10	21.3362	46.883	1.0976	43.3859	0.731584	11.4888
2018-05-11 11	22.58	45.8988	1.02765	45.0122	0.705901	10.2207
2018-05-11 12	24.3627	47.8187	0.978937	48.9794	0.716322	10.0397
2018-05-11 13	17.8355	38.8593	1.09455	58.9187	0.638056	7.79614
2018-05-11 14	15.4083	35.5735	0.989951	65.1643	0.615123	7.83306
2018-05-11 15	9.4685	26.6022	0.949362	54.0377	0.553414	6.83534
2018-05-11 16	11.0928	28.4247	0.920038	50.7619	0.572573	9.77048
2018-05-11 17	12.6697	29.5728	0.928004	44.7301	0.619117	11.6772
2018-05-11 18	15.9593	32.5532	0.9415	40.5091	0.669422	12.8689
2018-05-11 19	19.98	39.4598	1.06246	35.814	0.709252	15.4655
2018-05-11 20	21.9275	42.2012	0.997346	20.4382	0.771275	24.5931
2018-05-11 21	32.5338	58.1152	1.16394	6.59842	0.831176	39.5462
2018-05-11 22	37.6608	69.7717	1.40484	4.69802	0.852926	41.1912
2018-05-11 23	35.3218	72.1313	1.47002	2.31758	0.84386	43.8376
2018-05-12 00	44.1377	81.5775	1.40987	3.92474	0.849175	37.2132
2018-05-12 01	42.4203	83.0102	1.50766	3.06519	0.826962	35.9642
2018-05-12 02	35.828	69.8372	1.27176	2.7875	0.778211	28.3676
2018-05-12 03	37.0655	78.0275	1.33316	3.00465	0.845692	30.2496
2018-05-12 04	35.0492	75.8918	1.30374	2.42766	0.832929	27.8206
2018-05-12 05	36.369	74.0413	1.28255	2.75118	0.839732	24.5988
2018-05-12 06	37.0953	75.5382	1.37157	5.04195	0.877911	22.4369
2018-05-12 07	38.567	77.529	1.68556	12.2522	0.855301	16.7775
2018-05-12 08	31.3718	67.1355	2.48422	22.0998	0.810933	14.0079
2018-05-12 09	27.9827	62.1625	2.27542	27.6566	0.813471	14.184
2018-05-12 10	23.4663	53.4637	1.99883	34.9207	0.786146	13.757
2018-05-12 11	23.5187	53.3273	1.67252	52.6549	0.750306	11.5636
2018-05-12 12	23.37	51.8288	1.50743	68.4262	0.702846	8.56942
2018-05-12 13	17.9172	43.2645	1.3912	70.9722	0.652406	5.73554
2018-05-12 14	19.5073	46.5413	1.40869	80.2546	0.646145	5.78401
2018-05-12 15	29.9715	64.5255	1.57136	94.3614	0.709286	7.5998
2018-05-12 16	36.538	76.4375	1.59556	91.1455	0.72721	9.14963
2018-05-12 17	54.472	97.449	1.69341	90.8051	0.750828	10.7961
2018-05-12 18	64.2277	107.704	1.83525	83.473	0.750596	10.5106
2018-05-12 19	64.4455	106.183	1.56193	62.8395	0.779374	13.7647
2018-05-12 20	79.2605	115.326	1.41535	48.5238	0.809063	18.1343
2018-05-12 21	90.5488	121.903	1.29648	36.7916	0.824376	21.6351
2018-05-12 22	109.037	138.479	1.1401	17.9021	0.906002	36.0001
2018-05-12 23	113.868	140.402	1.12758	4.20173	0.964215	46.8269
2018-05-13 00	108.368	138.563	1.16854	3.37844	0.921057	43.5656
2018-05-13 01	100.516	135.922	1.07819	3.82266	0.914916	40.219
2018-05-13 02	92.3833	128.569	1.09208	4.18201	0.901241	34.6824
2018-05-13 03	83.9098	114.353	0.999782	12.0359	0.82045	18.4061
2018-05-13 04	96.7318	130.353	1.06694	4.47018	0.903133	27.9748
2018-05-13 05	99.9085	132.676	1.1105	3.75904	0.926148	27.0327
2018-05-13 06	87.8007	117.525	1.15195	6.04237	0.952289	23.0319
2018-05-13 07	72.6337	103.419	1.04111	12.8426	0.907322	18.4224
2018-05-13 08	52.147	81.7709	1.05377	23.236	0.875719	14.4334
2018-05-13 09	40.2125	66.9805	1.16402	35.6658	0.823201	11.7563
2018-05-13 10	29.5123	51.6165	1.11717	49.5289	0.769574	7.52362
2018-05-13 11	24.9438	44.761	1.10994	57.3542	0.71652	5.5155
2018-05-13 12	19.3497	37.0805	1.31985	59.7665	0.631297	3.54508
2018-05-13 13	14.0102	30.4993	1.53683	56.0699	0.531896	2.69386
2018-05-13 14	13.4433	30.7835	1.4426	60.0006	0.490945	4.30525
2018-05-13 15	34.1281	65.516	2.04316	87.0895	0.567405	8.45277
2018-05-13 16	38.3853	71.4533	2.23424	66.9877	0.558673	11.4773
2018-05-13 17	46.1153	80.4376	2.21047	58.1694	0.553157	13.3277
2018-05-13 18	52.1092	85.9476	2.24652	49.6002	0.54154	13.5757
2018-05-13 19	59.2278	92.8852	2.19441	45.7192	0.553088	12.2728
2018-05-13 20	60.333	100.199	2.35962	36.9329	0.560307	13.682
2018-05-13 21	49.2808	90.156	2.34582	29.2367	0.583505	16.1001
2018-05-13 22	44.0872	85.23	2.18771	29.1841	0.565673	15.0382
2018-05-13 23	42.0302	81.6822	2.238	23.9766	0.568816	16.8729
2018-05-14 00	40.8053	82.8414	2.04354	7.73489	0.611786	30.0403
2018-05-14 01	45.9242	89.8174	2.29129	12.5058	0.623901	25.8237
2018-05-14 02	47.8577	89.5133	2.43927	11.9552	0.637102	25.3119
2018-05-14 03	50.6185	90.8329	2.36747	6.12319	0.674452	29.3641
2018-05-14 04	54.4622	97.0122	2.28903	4.59717	0.677049	30.463
2018-05-14 05	57.7773	101.182	2.36672	6.7929	0.700897	26.5708
2018-05-14 06	56.4302	98.1535	2.09385	7.28081	0.716042	26.118
2018-05-14 07	63.6203	107.166	1.87635	9.75679	0.752541	25.7248
2018-05-14 08	69.2736	110.959	1.75505	18.5747	0.74332	20.7041
2018-05-14 09	60.75	103.039	1.8048	29.6475	0.704312	18.9542
2018-05-14 10	51.1769	88.9795	1.77867	44.423	0.670032	14.4112
2018-05-14 11	39.3149	67.9944	1.72689	64.3335	0.584254	8.2754
2018-05-14 12	46.0148	78.7492	1.66568	67.2346	0.577235	7.55878
2018-05-14 13	47.515	80.498	1.67725	69.5381	0.577101	8.17058
2018-05-14 14	36.7418	65.8522	1.62413	66.5183	0.532116	7.60233
2018-05-14 15	33.233	59.3823	1.38164	60.1564	0.455851	7.7847
2018-05-14 16	38.1513	65.5438	1.18292	51.4594	0.463957	9.82964
2018-05-14 17	29.8287	54.283	1.37344	44.3361	0.464053	11.2562
2018-05-14 18	30.117	54.1807	1.4628	40.9973	0.462024	11.9829
2018-05-14 19	29.3917	52.5532	1.53102	33.4629	0.456262	14.256
2018-05-14 20	29.8557	52.9588	1.60731	29.1231	0.444363	15.5156
2018-05-14 21	30.6932	55.6033	1.56804	27.7192	0.465031	14.9628
2018-05-14 22	29.1803	54.2213	1.60533	23.4208	0.485315	16.4475
2018-05-14 23	28.9957	54.2743	1.86961	18.0532	0.514599	19.0304
2018-05-15 00	28.8977	54.05	1.98944	13.4417	0.522868	21.8878
2018-05-15 01	29.2465	54.3877	2.09983	16.435	0.512155	17.5258
2018-05-15 02	29.7912	54.9337	2.24253	11.9429	0.525844	19.6842
2018-05-15 03	29.832	52.76	2.57961	13.2714	0.511094	15.8308
2018-05-15 04	33.713	54.9959	2.18655	9.72999	0.553645	16.2002
2018-05-15 05	37.5867	58.0383	2.03669	8.9979	0.602949	15.6405
2018-05-15 06	37.3033	59.1835	1.86796	8.72238	0.714253	18.104
2018-05-15 07	35.4347	57.191	2.23845	15.9636	0.684375	15.1442
2018-05-15 08	31.7228	56.1132	2.41894	24.7966	0.656654	16.8505
2018-05-15 09	26.0059	50.8883	2.09606	39.5648	0.605291	14.2087
2018-05-15 10	26.9164	53.2803	1.92591	54.8465	0.564741	13.7669
2018-05-15 11	27.4858	53.7877	2.09013	70.7384	0.531184	11.7206
2018-05-15 12	27.0208	52.3952	2.15296	78.3345	0.48032	9.22033
2018-05-15 13	22.2216	46.4978	2.09253	78.8015	0.458957	8.92929
2018-05-15 14	18.703	42.2475	1.97692	73.0507	0.418332	9.0067
2018-05-15 15	18.1588	43.3935	1.87661	69.076	0.408348	11.4674
2018-05-15 16	18.1613	45.2446	2.10242	66.7577	0.412153	12.8492
2018-05-15 17	15.3818	42.8832	2.09411	51.9894	0.410672	15.8735
2018-05-15 18	14.1923	42.0207	2.15906	39.5883	0.405443	17.1632
2018-05-15 19	14.6348	42.9493	2.32965	28.1851	0.41475	19.8368
2018-05-15 20	15.7822	46.003	2.45837	22.4888	0.438497	22.3989
2018-05-15 21	16.4647	47.0498	2.6808	19.951	0.434522	21.4558
2018-05-15 22	17.0273	46.53	2.74073	17.9816	0.439813	21.9916
2018-05-15 23	19.3352	49.1198	2.88144	14.6089	0.473497	24.654
2018-05-16 00	21.5317	49.6495	2.98755	12.2885	0.473093	24.8866
2018-05-16 01	22.3037	49.7483	2.6769	11.0359	0.486701	24.2084
2018-05-16 02	24.0528	52.1405	2.4088	11.9805	0.483899	23.2934
2018-05-16 03	25.3292	53.4602	2.30553	5.32014	0.522084	28.8201
2018-05-16 04	25.9087	54.5057	1.94066	3.99798	0.521024	28.6947
2018-05-16 05	27.5308	56.0692	1.85516	5.38146	0.54085	26.5711
2018-05-16 06	29.515	60.507	2.01097	7.1489	0.615025	25.3941
2018-05-16 07	28.0937	62.5661	2.27244	12.6893	0.620723	24.9776
2018-05-16 08	28.4385	64.878	2.32118	26.9674	0.63209	23.1213
2018-05-16 09	31.5652	69.7715	2.14086	42.5553	0.616701	23.9599
2018-05-16 10	27.8568	61.1565	1.90641	62.8428	0.536273	16.5348
2018-05-16 11	23.5335	54.2162	1.97138	73.2523	0.462363	11.5385
2018-05-16 12	26.558	58.5693	2.49571	89.1515	0.460819	11.3919
2018-05-16 13	23.721	54.9262	2.6989	89.6164	0.433402	10.903
2018-05-16 14	23.3782	57.5267	2.78212	86.7256	0.42206	11.9496
2018-05-16 15	20.9378	57.9903	3.28652	76.9455	0.410277	13.8735
2018-05-16 16	19.6102	57.379	3.85128	65.4419	0.367089	15.7621
2018-05-16 17	19.585	56.0523	2.83965	55.0145	0.355272	17.627
2018-05-16 18	17.1653	51.9277	2.317	42.1798	0.344849	17.3346
2018-05-16 19	17.3498	51.4458	2.22473	30.4192	0.383287	18.6902
2018-05-16 20	17.7482	49.9682	2.31212	24.3439	0.392252	19.7772
2018-05-16 21	17.8612	49.1223	2.24407	20.6527	0.383862	19.5409
2018-05-16 22	18.6077	49.6297	2.50063	17.7218	0.397848	21.2329
2018-05-16 23	18.3173	48.4133	2.48156	14.9782	0.393595	21.1023
2018-05-17 00	16.4842	46.854	2.53039	13.47	0.384041	20.8849
2018-05-17 01	14.6128	45.5269	2.58834	11.1827	0.388237	21.7394
2018-05-17 02	14.0215	43.6119	2.52003	12.3506	0.396182	20.0381
2018-05-17 03	14.3163	42.7585	2.57473	12.3897	0.40198	19.3466
2018-05-17 04	14.9388	42.2617	2.46905	12.5314	0.407433	17.8953
2018-05-17 05	15.7107	41.1168	2.34944	11.917	0.425339	17.2459
2018-05-17 06	18.2465	46.0995	2.45123	11.7131	0.489076	18.6756
2018-05-17 07	18.0285	49.1193	2.48507	13.5704	0.519046	21.6509
2018-05-17 08	19.596	52.59	2.21561	23.2738	0.539987	21.5661
2018-05-17 09	20.7357	54.9481	1.98564	41.0902	0.507115	18.7339
2018-05-17 10	18.8517	48.744	1.65188	55.1047	0.437142	12.8172
2018-05-17 11	20.7365	49.6937	0	61.5298	0	11.4637
2018-05-17 12	22.7518	52.1453	2.5545	126.243	0.409009	12.3619
2018-05-17 13	29.8083	63.7305	2.41715	0	0.435258	13.5044
2018-05-17 14	36.5853	74.0448	2.63986	100.623	0.444049	13.137
2018-05-17 15	35.8535	75.4018	2.80545	97.3782	0.445536	11.7515
2018-05-17 16	31.3972	68.9918	2.74751	87.4735	0.420536	12.2055
2018-05-17 17	30.8026	66.6657	2.85886	82.1291	0.428783	12.588
2018-05-17 18	29.6175	64.8693	2.72006	67.6592	0.443668	14.7531
2018-05-17 19	28.6228	64.2037	2.77577	52.1981	0.475369	16.1411
2018-05-17 20	26.892	64.8773	2.90375	41.7588	0.493312	17.4345
2018-05-17 21	26.2745	64.674	2.89069	35.4976	0.511124	18.102
2018-05-17 22	29.5457	66.6258	2.82948	32.0963	0.553592	18.2677
2018-05-17 23	31.4015	68.9062	2.65551	22.2491	0.607211	23.2917
2018-05-18 00	32.9903	72.1908	2.26004	7.64601	0.645813	33.502
2018-05-18 01	37.2648	80.8937	1.91293	1.33621	0.709171	38.5568
2018-05-18 02	43.0272	86.3812	1.90632	3.73184	0.736035	31.9911
2018-05-18 03	51.061	90.409	2.15741	13.2981	0.679523	18.5091
2018-05-18 04	56.9288	93.5573	1.95511	12.4795	0.69462	16.4528
2018-05-18 05	60.8035	96.2382	1.70777	11.7917	0.716346	15.5833
2018-05-18 06	55.4248	89.5203	1.59276	14.3073	0.72615	14.7088
2018-05-18 07	49.0525	86.034	1.62422	18.2318	0.779812	16.722
2018-05-18 08	31.5703	62.1393	1.99098	47.6056	0.772077	12.2251
2018-05-18 09	26.1897	54.0007	1.73396	71.4215	0.76599	9.55767
2018-05-18 10	20.2117	43.0517	2.43767	78.9507	0.691435	6.18407
2018-05-18 11	16.6978	36.5005	2.49272	77.4089	0.591188	4.12308
2018-05-18 12	16.2773	35.4162	2.0446	80.4052	0.542448	4.00212
2018-05-18 13	16.9755	36.7252	1.91845	82.3669	0.4943	4.40231
2018-05-18 14	35.9357	67.2427	2.35204	109.615	0.540167	8.09763
2018-05-18 15	39.9525	71.9325	2.56283	84.3536	0.523154	10.6021
2018-05-18 16	24.7108	50.3665	1.91981	64.2074	0.463425	10.6113
2018-05-18 17	26.5308	55.9892	1.69154	55.203	0.526688	17.657
2018-05-18 18	38.0195	74.4602	2.7498	56.275	0.580881	18.4773
2018-05-18 19	44.4462	81.736	2.82077	52.6437	0.578951	15.8554
2018-05-18 20	47.3469	83.8545	2.99884	42.6276	0.589105	19.4071
2018-05-18 21	46.2738	86.3287	3.10895	35.3926	0.61625	21.2877
2018-05-18 22	44.1405	83.5138	2.92923	31.2233	0.628225	20.2798
2018-05-18 23	44.3593	83.9123	2.99328	26.2621	0.631176	21.4809
2018-05-19 00	42.5252	76.8667	2.41056	31.457	0.606324	15.8697
2018-05-19 01	47.6751	82.9289	2.83741	17.5855	0.627814	20.3138
2018-05-19 02	46.6307	81.8217	2.78726	14.9275	0.646513	21.009
2018-05-19 03	45.3455	79.7862	2.21417	10.3992	0.660834	22.5264
2018-05-19 04	53.9189	91.4217	2.53619	5.67177	0.684508	24.0432
2018-05-19 05	60.522	96.2856	2.45306	4.14581	0.691978	24.5808
2018-05-19 06	61.2568	97.1955	2.57753	10.7167	0.696239	19.4138
2018-05-19 07	54.7225	89.7081	2.54631	15.2506	0.70549	18.7954
2018-05-19 08	61.6788	97.6341	2.21353	9.21905	0.759698	27.1819
2018-05-19 09	73.1583	116.564	2.17449	12.2921	0.793622	23.4709
2018-05-19 10	50.3603	80.6127	1.72862	18.6911	0.741446	15.9873
2018-05-19 11	36.4262	61.1334	1.57239	26.5684	0.713716	14.6526
2018-05-19 12	36.273	60.65	1.37306	51.3349	0.680418	8.71538
2018-05-19 13	40.3018	66.0278	1.24049	67.185	0.655384	6.40687
2018-05-19 14	42.8663	68.1422	1.1647	64.7119	0.62334	7.35374
2018-05-19 15	42.713	65.9388	1.2352	58.0642	0.61922	9.84176
2018-05-19 16	43.2272	67.1666	1.30506	52.9067	0.632405	11.1435
2018-05-19 17	42.1575	66.0546	1.19338	54.6566	0.63679	9.06123
2018-05-19 18	41.8888	63.7041	1.015	50.9704	0.618319	7.92852
2018-05-19 19	39.471	61.3912	0.998453	47.7422	0.620215	8.46323
2018-05-19 20	44.8303	67.4543	1.21676	29.6762	0.697876	17.6688
2018-05-19 21	47.1623	68.5029	1.4774	28.138	0.684355	14.1473
2018-05-19 22	53.2677	72.2777	1.21381	21.6765	0.715167	15.8855
2018-05-19 23	62.3816	78.6102	1.11098	16.4215	0.711315	17.4068
2018-05-20 00	56.0629	70.3148	1.1007	18.8765	0.710725	8.08635
2018-05-20 01	49.438	67.0463	1.02136	18.9429	0.749511	6.78461
2018-05-20 02	50.6739	67.0183	0.999578	14.53	0.775471	9.22055
2018-05-20 03	47.2432	62.5104	0.958427	23.8988	0.758638	7.38536
2018-05-20 04	52.946	68.1145	0.997509	21.721	0.771328	9.221
2018-05-20 05	55.1474	70.4818	1.03546	19.768	0.775025	8.87822
2018-05-20 06	49.0333	63.6115	1.00639	23.7818	0.784611	8.20967
2018-05-20 07	46.6978	60.8825	1.01182	22.5606	0.806286	10.4101
2018-05-20 08	42.5143	57.1948	1.07814	26.0316	0.796526	9.7001
2018-05-20 09	38.1323	55.0811	1.27416	29.9199	0.811217	11.0937
2018-05-20 10	33.0834	51.6193	1.29842	44.061	0.821609	9.65699
2018-05-20 11	30.7012	50.1492	1.34085	65.6996	0.818137	7.99955
2018-05-20 12	29.3343	47.993	1.36668	80.9206	0.787478	5.81769
2018-05-20 13	27.9345	46.7548	1.39407	84.5269	0.724872	4.42298
2018-05-20 14	29.9627	51.3872	1.38257	85.675	0.67967	4.86963
2018-05-20 15	32.6219	56.1844	1.5789	82.367	0.650489	6.75988
2018-05-20 16	32.031	53.8915	1.68696	70.6234	0.599907	8.48617
2018-05-20 17	28.3836	49.4836	1.44871	56.0983	0.617351	8.19322
2018-05-20 18	9.0635	26.477	1.13789	55.9191	0.532806	7.08136
2018-05-20 19	8.1275	22.2408	0.956098	47.7747	0.597683	9.16273
2018-05-20 20	10.0068	23.2935	0.951489	44.6992	0.604009	10.294
2018-05-20 21	11.4733	24.0113	0.995784	34.7236	0.617682	14.7212
2018-05-20 22	13.7493	27.9597	0.955562	27.7305	0.61768	15.5936
2018-05-20 23	12.531	25.6902	0.931839	22.9462	0.643451	14.1959

## Sheet: JSS
time	formaldehyde	acetaldehyde	acrolein	acetone	propionaldehyde	crotoraldehyde	butyaldehyde	benzaldehyde	isovaleraldehyde	valeraldehyde	o-Tolualdehyde	m-Tolualdehyde	p-Tolualdehyde	hexaldehyde	2,5-diemthybenzaldehyde	MACR	total
2018-05-08 01:00:14	1.14482	1.10823		0.357108	0.169294	0.0215721	0.0721447					0.00788452		0.00664165			2.8877
2018-05-08 03:00:14	1.2909	0.976833		0.218909	0.0190425	0.0597893			0.00140871							0.0272314	2.59411
2018-05-08 05:00:14	1.30022	0.906897		0.254262	0.0574489	0.0544628			0.0138704							0.00366192	2.59082
2018-05-08 07:00:14	1.10753	1.69738		0.345858	0.196612		0.0606253		0.0114864	0.000352177				0.0205259			3.44037
2018-05-08 09:00:14	1.11063	2.63197		0.33943	0.248034		0.106314		0.00433448					0.0381376		0.00139819	4.48026
2018-05-08 11:00:14	0.809159	2.29289		0.297649	0.185363		0.0801692		0.016471	0.0028445				0.0196873			3.70423
2018-05-08 13:00:14	1.34062	3.24656		0.459952	0.350879		0.124823		0.120173	0.0125971				0.0299374		0.00712408	5.69266
2018-05-08 15:00:14	2.14247	4.36976		0.546727	0.431227		0.214129		0.0169045	0.00165252				0.112218			7.83509
2018-05-08 17:00:14	1.28468	2.12335		0.2864	0.113692		0.044058		0.172187	0.00273614				0.0110212	0.00152157	0.00632511	4.04596
2018-05-08 19:00:14	1.28778	0.932324		0.334608	0.120763		0.048588							0.00356657			2.72763
2018-05-08 21:00:14	0.871315	0.978947		0.283186	0.111442		0.00341695			0.00436156	0.00398107	0.000116519				0.0125836	2.26935
2018-05-08 23:00:14	0.445525	0.985304		0.215693	0.122048		0.0153245		0.00346757		0.00460251					0.00992042	1.80189
2018-05-09 01:00:14	0.554303	0.932322		0.156236	0.0603411		0.0198545		0.00238395	0.000352175				0.0116735			1.73747
2018-05-09 03:00:14	0.840234	1.14001		0.279971	0.110478		0.0450933			2.70904e-05					0.00409517		2.41991
2018-05-09 05:00:14	1.2163	1.82664		0.318538	0.13876		0.072144		0.015279	0.000677259	0.00211676						3.59045
2018-05-09 07:00:14	1.01117	1.07431		0.209265	0.0881411		0.0282674			0.00186923	0.0105061		0.00143707		0.000478204		2.42544
2018-05-09 09:00:14	0.339854	0.149894		0.122329	0.0182389	0.0013316			0.0430194								0.674666
2018-05-09 11:00:14	1.61722	4.03065		0.352283	0.204645		0.0621778		0.154848					0.043635		0.0109857	6.47644
2018-05-09 13:00:14	1.50844	5.25981		0.439058	0.315524		0.174005	0.00147314	0.250206					0.0945125		0.00765666	8.05068
2018-05-09 15:00:14	1.36547	5.76842		0.355496	0.283385		0.153296		0.368319	0.0195321	0.00514623			0.101967			8.42104
2018-05-09 17:00:14	0.871309	3.33129		0.33782	0.204644				0.190607	0.000677256	0.00203907			0.0237871		0.00312924	4.96531
2018-05-09 19:00:14	1.06089	2.04492		0.344247	0.178933		0.014289							0.0222961			3.66557
2018-05-09 21:00:14	0.94279	1.98134		0.231761	0.102282		0.0370684		0.00671837	0.00262775				0.0174507			3.32204
2018-05-09 23:00:14	0.700371	0.191642		0.140005	0.0431463	0.0159791	0.0164892	0.00323211					0.00469957	0.00953019			1.12509
2018-05-10 01:00:14	0.0787859	0.0223155		0.0424634		0.0199738				0.00295283		0.00788439	0.0012817				0.175658
2018-05-10 03:00:14	0.82158	1.94107		0.228547	0.122047	0.00213054	0.0506583				0.00056317					0.0241683	3.19076
2018-05-10 05:00:14	0.420657	2.09789		0.21087	0.107906	0.0511329	0.0295615							0.00533699		0.000332897	2.92369
2018-05-10 07:00:14	0.889953	3.03459		0.263899	0.174111		0.0428926		0.0701092	0.000677252							4.47623
2018-05-10 09:00:14				0.00137393		0.0202401		0.0138738	0.0010836								0.0365715
2018-05-10 11:00:14	1.72598	6.40415		0.379598	0.241602	0.000665792	0.0993232		0.268625	0.00186921				0.0620846	0.000756425	0.0244346	9.20909
2018-05-10 13:00:14	2.17329	7.82211		0.562827	0.236308	0.0448298	0.1187		0.751175	0.0126721				0.0546948			11.7766
2018-05-10 15:00:14	1.59234	6.31937		0.459944	0.278561		0.16106		0.562281		0.00110692			0.0348755			9.40954
2018-05-10 17:00:14	1.02981	4.13657		0.33621	0.183752		0.0955696		0.121255	0.00522837	0.00848635			0.000621986		0.000998685	5.9185
2018-05-10 19:00:14	0.964539	3.58557		0.268719	0.130402	0.0041279	0.0317616	0.00173697	0.0188546	0.00327789	0.00996224			0.0241596			5.04311
2018-05-10 21:00:14	0.945891	3.03457		0.676878	0.140365	0.000798947	0.0469046			0.00977948							4.85519
2018-05-10 23:00:14	1.09507	3.07695		0.368348	0.191787		0.0650245	0.0045513	0.0105109	0.00251937		0.00633077		0.0104619			4.83156
2018-05-11 01:00:14	0.980076	2.9498		0.270325	0.108869		0.0454808		0.098499	0.000568889		0.00943789		0.0116733		6.65788e-05	4.4748
2018-05-11 03:00:14	1.24735	2.97099		0.320139	0.119796		0.0480694		0.042477	0.00837078		0.0109914				0.001265	4.76945
2018-05-11 05:00:14	1.11061	2.99218		0.257469	0.138276	0.00892155	0.0114414			0.0013274		0.0015924					4.52181
2018-05-11 07:00:14	1.91555	7.84517		0.495294	0.313912		0.174002		0.00996907	0.0118383	0.00421403			0.0529524	0.00145198		10.8244
2018-05-11 09:00:14	0.921023	3.75509		0.288	0.161255	0.018642	0.073437	0.00226465		0.00100232	0.00211672		0.000194195	0.012605	0.00131287	0.00818917	5.24513
2018-05-11 11:00:14	1.08885	3.83986		1.13485	0.223924		0.132585	6.59606e-05	0.00368422	0.00403639				0.00421876		0.00579234	6.43786
2018-05-11 13:00:14	1.71664	8.14184		2.49591	0.452107		0.458741		0.123421					0.0236935			13.4124
2018-05-11 15:00:14	2.90385	8.18422		1.3325	0.730103		0.449681		0.837508	0.00511997				0.0854723		0.00113183	14.5296
2018-05-11 17:00:14	2.84169	5.23852		1.30357	0.517989	0.00585891	0.307311		0.614288	0.000568885	0.0128362	0.00322362		0.023973			10.8698
2018-05-11 19:00:14	1.6607	2.9074		1.22001	0.256062		0.2646		0.0399845	0.0055534	0.00258278			0.00384603			6.36073
2018-05-11 21:00:14	1.10749	2.20806		0.906661	0.283379		0.175295			0.0013274							4.68221
2018-05-11 23:00:14	0.930343	2.14448		0.778107	0.2882		0.150704			0.00967103	0.0111273	0.000970969		0.00543009		0.00259656	4.32163
2018-05-12 01:00:14	1.04844	1.96435		0.641519	0.270524		0.14941		0.0175541	0.000352166	0.0202156	0.00244684		0.00384602		0.0175101	4.13617
2018-05-12 03:00:14	1.44936	2.01097		0.67205	0.256061		0.142939				0.0141567	0.032741		0.00272785			4.581
2018-05-12 05:00:14	1.28775	1.70792		0.482434	0.209461		0.112135			0.00674533	0.0167977	0.0474997	0.0101369		0.000478193	0.000998673	3.88235
2018-05-12 07:00:14	1.38409	3.18288		0.702581	0.485849		0.269776		0.00660987	0.0115131	0.0126808	0.0467229	0.000660257				6.10336
2018-05-12 09:00:14	2.08336	4.94181		1.85313	0.802409		0.472975	0.00305615	0.413821		0.00250509	0.00866101		0.0550951			10.6368
2018-05-12 11:00:14	1.56745	4.6875		2.17451	0.837761		0.542865	0.00129721	0.388898	0.00186918	0.00335954	0.000970965		0.0445657		0.0270973	10.2781
2018-05-12 13:00:14	1.81608	7.44244		1.32767	1.36322		0.677467		2.66117	0.00739546				0.0973055		0.148402	15.5411
2018-05-12 15:00:14	2.56196	7.14575		0.871304	1.36322		0.680055		3.71225	0.0103211				0.13085			16.4757
2018-05-12 17:00:14	3.49432	4.412		0.569205	0.791159		0.409555		2.10854	0.00847903				0.0545358			11.8478
2018-05-12 19:00:14	3.37	3.03452		0.610984	0.403895				0.465832	0.00241097				0.0232274			7.91087
2018-05-12 21:00:14	2.66141	2.27162		0.827915	0.358901	0.0661784	0.242595					0.00322359		0.00664138			6.43848
2018-05-12 23:00:14	1.41516	2.29281		0.710611	0.370149	0.105459	0.264598			0.0101044				0.00869133		0.0105859	5.18816
2018-05-13 01:00:14	1.12302	1.98552		0.625445	0.376577	0.051398	0.223181		0.00964385	0.0132468	0.0151664	0.00205844		0.00738681	0.00312127	0.00219707	4.43797
2018-05-13 03:00:14	1.8285	2.01307		0.54992	0.338011	0.148069	0.183059	0.00331997	0.0571046					0.0159593		0.0123169	5.14933
2018-05-13 05:00:14	1.70419	1.95797		0.61741	0.371755	0.0644472	0.245183			0.0104294	0.00405861			0.00216875		0.056125	5.03373
2018-05-13 07:00:14	1.22869	3.16166		1.05448	0.503521		0.439321	0.00182488	0.240446	0.0173643				0.000230619		0.0117842	6.65932
2018-05-13 09:00:14	0.968223	1.52565		1.35996	0.162351	0.0597167	0.137463		0.00143252				0.00217231	0.00988095			4.22686
2018-05-13 11:00:14	1.24422	1.07427		0.916291	0.10501	0.0118508	0.0400441			0.00132738			0.000116515	0.00589592			3.39903
2018-05-13 13:00:14	0.470371	1.10606		0.709001	0.109028					0.000352162				0.00589591			2.40071
2018-05-13 15:00:14	0.448616	1.43877		0.892186	0.0868524	0.00173101	0.0273604			0.0131383							2.90865
2018-05-13 17:00:14	0.296332	1.39638		1.00949	0.00715066	0.011185	0.0283958			0.00197752	0.00110689				0.00604254	0.00233021	2.76039
2018-05-13 19:00:14	1.36542	1.58499		1.2457	0.212672		0.023607		0.000866858	0.00674524				0.00561636			4.44562
2018-05-13 21:00:14	0.992484	1.47055		1.05287	0.158037		0.0620461	0.00331995	0.000216714	0.00154409	0.00289344						3.74397
2018-05-13 23:00:14	1.22246	1.65068		0.951638	0.0846026	0.011185	0.0293017			0.000243803				0.0195	0.0095898		3.9792
2018-05-14 01:00:14	1.1572	1.6528		0.974134	0.0804246	0.0162448	0.0340904		0.00574292	0.00306109			0.00469941				3.92839
2018-05-14 03:00:14	0.750072	1.72697		1.20713	0.0743184	0.0197068	0.0536334	0.000857469	0.00195042	0.00165244				0.00365959			3.83995
2018-05-14 05:00:14	0.420643	1.87319		1.25373	0.0175954	0.00998656	0.0594575							0.00552317	0.00360812	0.00539274	3.64912
2018-05-14 07:00:14	0.43929	2.27159		1.32443	0.158037		0.0861188			0.00598671				0.0157728		0.00286281	4.30409
2018-05-14 09:00:14	0.675483	3.01329		1.75668	0.203029		0.133876	0.00288021	0.00465934	0.000893943				0.00263462		0.00153127	5.79496
2018-05-14 11:00:14	1.04531	4.05168		2.06199	0.236774		0.0131236			0.0017608		0.00322355	0.000271866		6.08598e-05		7.41419
2018-05-14 13:00:14	1.26597	6.14963		2.35122	0.222312	0.0279623	0.139053			0.00154408			0.00135933	0.0105548		0.0328224	10.2024
2018-05-14 15:00:14	1.83159	8.9681		2.73687	0.236773	0.0171768	0.175291	0.000857466	0.0284978	0.00902068		0.000194189			0.00138238	0.00991995	14.0157
2018-05-14 17:00:14	1.32501	13.4819		3.57245	0.254449	0.0403455	0.238709	0.00076952		0.00132737	0.00118455					0.00219703	18.9183
2018-05-14 19:00:14	1.02355	16.046		3.54031	0.408709		0.246474									0.0045938	21.2697
2018-05-14 21:00:14	0.768714	18.6314		3.95809	0.381392		0.267182							0.00263461		0.0309582	24.0404
2018-05-14 23:00:14	1.22556	18.8433		4.11878	0.427991		0.273653			0.00327777				0.0069208		0.00552586	24.905
2018-05-15 01:00:14	1.58606	19.6062		4.68118	0.481017		0.365543			0.000785582				0.0142819			26.735
2018-05-15 03:00:14	1.50215	17.6989		4.45621	0.447272	0.00639135	0.353895					0.00633055				0.000599189	24.4718
2018-05-15 05:00:14	3.30778	14.8805		4.76152	0.384604	0.0150463	0.388839		0.0017337					0.0198725			23.7599
2018-05-15 07:00:14	1.14475	12.7401		4.61689	0.562966		0.403075	0.0173031						0.0165181			19.5016
2018-05-15 09:00:14	1.2846	11.0236		5.08288	0.567787		0.462609	0.00261635		0.001219				0.00412545		0.00272963	18.4322
2018-05-15 11:00:14	0.821543	10.5574		5.62921	0.688301	0.00306251	0.426371	0.00296813		0.00176078			0.000194188	0.00319367			18.134
2018-05-15 13:00:14	1.25042	10.0912		6.54512	1.01289	0.0372828	0.625681			0.00598665				0.0253699			19.5939
2018-05-15 15:00:14	1.82536	8.88326		7.57351	1.25231	0.0711035	0.787459			0.00241091				0.0208974		0.836798	21.2531
2018-05-15 17:00:14	3.64962	7.5482		8.69831	1.39853	0.209316	0.884525			2.70889e-05				0.0457758		0.0115177	22.4458
2018-05-15 19:00:14	2.54014	6.23433		8.29659	1.51744		0.790046			0.00620335				0.0222019		0.637068	20.044
2018-05-15 21:00:14	1.79117	5.78931		8.52154	1.56404	0.0621821	0.771927		0.00769323	2.70888e-05				0.0131636	0.0043036	0.410708	18.9361
2018-05-15 23:00:14	1.38094	6.0436		9.32497	1.79382	0.098799	0.928527	0.00182484								0.593127	20.1656
2018-05-16 01:00:14	0.790461	5.76811		9.00359	1.84202	0.076163	0.861227			0.00262761						0.361441	18.7056
2018-05-16 03:00:14	1.06084	5.3019		9.05179	1.87416	0.0641793	0.892288		0.00910183					0.000100165		0.108452	18.3628
2018-05-16 05:00:14	1.49592	4.94165		10.1284	1.89023	0.0715026	1.00877	0.00525466		0.00251925				0.00980922		0.14174	19.6958
2018-05-16 07:00:14	1.42134	4.17876		10.9157	1.80988	0.184016	1.09936		0.0276305	0.00327774				0.0247175		0.462636	20.1273
2018-05-16 09:00:14	2.37853	3.92446		11.1728	1.80988	0.0653775	0.963468			0.00273596				0.0275128		0.148398	20.4932
2018-05-16 11:00:14	1.69482	3.96684		12.5386	1.98663	0.104125	1.34526	0.00279222		0.00121899						0.475951	22.1163
2018-05-16 13:00:14	1.55186	4.3059		12.5226	2.05091	0.0987985	1.37114		0.00563445					0.0145612		0.479945	22.4013
2018-05-16 15:00:14	1.19136	4.56019		13.8241	2.13125	0.136081	1.55233			2.70887e-05				0.0259288		0.234946	23.6562
2018-05-16 17:00:14	1.52699	6.19191		15.9612	2.19552	0.154722	1.88883	0.0324292						0.0262083		0.127093	28.1049
2018-05-16 19:00:14	2.54944	7.06074		15.0292	1.80987	0.0894777	1.56527	0.0591641		0.000677216				0.0472662		0.429346	28.6405
2018-05-16 21:00:14	2.75766	7.31503		14.4829	1.42905	0.0681734	1.42291	0.0165114									27.4922
2018-05-16 23:00:14	3.15234	6.48857		16.7003	1.35031	0.138743	1.66881	0.00736527	0.00314228					0.0300285		0.0380146	29.5776
2018-05-17 01:00:14	2.00247	4.984		15.6398	1.10768		1.78529				0.000330115			0.0161452		0.558502	26.0942
2018-05-17 03:00:14	1.57671	3.64895		17.1823	0.940566		1.99236	0.00164894	0.000108354				0.0101365	0.0183814	0.00214743	0.735592	26.109
2018-05-17 05:00:14	1.1292	3.3099		17.9858	0.877899	0.201324	2.38062			2.70885e-05				0.00906373		0.623745	26.5175
2018-05-17 07:00:14	1.34052	2.71654		20.0746	0.882718	0.202655	3.06655							0.0215493		0.51323	28.8184
2018-05-17 09:00:14	2.5774	2.88607		19.9139	0.839333	0.160047	2.04412							0.0400914	0.000617277	0.0156452	28.4773
2018-05-17 11:00:14	3.21448	3.16155		21.0387	0.882717	0.203987	3.02772		0.0627369	0.00316935				0.043073	0.00124325	1.64101	33.2804
2018-05-17 13:00:14	3.68064	3.96681		24.0917	1.01287		3.44186		0.00335897	0.00035215		0.00221371		0.041489		2.37334	38.6146
2018-05-17 15:00:14	2.96586	4.9204		24.8951	0.844152	0.120102	3.58422		0.0113771	0.0162802				0.0650625		0.59445	38.017
2018-05-17 17:00:14	2.40958	6.27662		29.0728	0.871468	0.00559231	3.9466				0.00102918			0.0522042		0.234944	42.8709
2018-05-17 19:00:14	2.16717	6.67924		18.4677	0.821655	0.0667082	2.4712							0.0782002		0.00592518	30.7578
2018-05-17 21:00:14	2.66441	5.51373		28.9121	0.797552	0.286539	3.53245			0.0650392				0.0474521		0.254916	42.0742
2018-05-17 23:00:14	2.48105	3.90322		31.1617	0.6915	0.190671	3.15713							0.0181949		0.230949	41.8344
2018-05-18 01:00:14	2.22311	3.37344		35.1787	0.665791	0.286539	3.58421					0.000349531		0.0241581		1.49454	46.8309
2018-05-18 03:00:14	2.21689	2.48342		31.483	0.561346	0.214638	2.88534							0.0491292	0.00207786	1.25887	41.1547
2018-05-18 05:00:14	1.41821	2.25032		31.6437	0.511534	0.209311	2.80769		0.0438831					0.0372959		1.36139	40.2833
2018-05-18 07:00:14	1.24106	2.25032		34.2146	0.469756	0.233278	3.26065		0.00715131					0.024624		1.70758	43.409
2018-05-18 09:00:14	1.22889	4.49303		16.2692	0.426464	0.119765	1.6333	0.0736649		0.0396006	0.000101313			0.521548		0.309068	25.1147
2018-05-18 11:00:14	1.90408	4.92036		9.05161	0.532422		0.990629	0.0326926		0.0650389				0.709463		0.0286937	18.235
2018-05-18 13:00:14	2.31366	5.91633		11.2048	0.598301	0.021437	1.25076		0.011052	0.175559				0.825932		0.0129821	22.3308
2018-05-18 15:00:14	2.53994	5.21703		10.0639	0.604728	0.0139807	1.21841	0.0217877	0.0470251	0.119215		0.00174765		0.854815		0.0039279	20.7065
2018-05-18 17:00:14	2.63046	5.19583		11.2529	0.601514	0.0262304	1.25853	0.00331982	0.0364065	0.149554				0.911652		0.00272956	22.0692
2018-05-18 19:00:14	2.69834	5.11107		11.5743	0.595086	0.057121	1.47465	0.00630985	0.0135441	0.117048				0.934013		0.187008	22.7685
2018-05-18 21:00:14	2.65308	6.59442		12.5866	0.627222	0.0308906	1.53936	0.147985	0.142917	0.127883				0.989917		0.0796897	25.52
2018-05-18 23:00:14	2.65308	5.2594		12.2973	0.587051	0.0774927	1.43583	0.0653189	0.0152777	0.134384	0.0018059			0.999234		0.0794233	23.6056
2018-05-19 01:00:14	2.49468	6.27655		11.4939	0.525992	0.0177088	1.30641		0.2361	0.160389				1.00855		0.310836	23.8311
2018-05-19 03:00:14	2.47205	5.15344		13.6792	0.534026		1.48759	0.10929	0.214429	0.00425283	0.00281564			1.00855		0.619741	25.2854
2018-05-19 05:00:14	2.42679	4.28461		13.406	0.497069	0.0572539	1.29346	0.0368256	0.0588353	0.156054				0.989915		0.0547907	23.2616
2018-05-19 07:00:14	2.29101	4.39056		13.3096	0.543666	0.0961332	1.50053	0.057404	0.291359	0.0227811				0.943327		0.401376	23.8478
2018-05-19 09:00:14	2.22313	4.36937		13.5346	0.543665	0.0283606	1.23652	0.00771688	0.0909075	0.165806				0.915374	6.08573e-05	0.00046602	23.1159
2018-05-19 11:00:14	2.11224	6.00105		11.8313	0.440829	0.0315562	1.11616	0.0846658	0.124497	0.125716				0.821267		0.0815534	22.7709
2018-05-19 13:00:14	2.20502	7.20891		12.3616	0.45529	0.035018	1.10451	0.00912394	0.0140858	0.0249481			0.00166996	0.839901		0.132416	24.3925
2018-05-19 15:00:14	2.1756	7.29367		9.871	0.448862	0.0500637	1.28052	0.00252832	0.132081	0.106212				0.751385		0.268227	22.3801
2018-05-19 17:00:14	2.03757	7.29366		8.48913	0.379769	0.0628459	1.07733	0.0518635	0.104993	0.0607041				0.604168		0.775521	20.9376
2018-05-19 19:00:14	2.22312	11.4894		11.0761	0.448862	0.0319555	1.10192	0.00411126	0.146167	0.171223				0.804493			27.4973
2018-05-19 21:00:14	2.17107	9.4339		11.4939	0.466536	0.0263633	1.22875	0.0626802	0.0219954	0.150636				0.803561		0.143067	26.0024
2018-05-19 23:00:14	1.96062	7.50555		9.58175	0.387803		1.10062	0.000153897	0.11041	0.100794				0.702932			21.4506
2018-05-20 01:00:14	1.72755	5.38649		8.90688	0.336385		0.777077			0.148469				0.633983		0.00392786	17.9208
2018-05-20 03:00:14	1.68003	5.55601		8.97115	0.333171		0.80296	0.0107948	0.127746	0.0563699				0.63305		0.0132482	18.1845
2018-05-20 05:00:14	1.82032	5.36529		9.13182	0.320316		0.870256	0.00824448	0.0175529	0.0953764				0.612552		0.250916	18.4927
2018-05-20 07:00:14	2.00588	5.38648		10.2405	0.346025	0.0471342	0.966025	0.000329779	0.111494	0.122464				0.688954		0.0523935	19.9677
2018-05-20 09:00:14	2.0896	5.3441		10.9154	0.106772		0.940141	0.0151039		0.127882			0.00198064	0.760697		0.00778912	20.3094
2018-05-20 11:00:14	2.23668	5.45004		13.1809	0.437612	0.0854805	0.975083	0.0544134	0.0368394	0.133299				0.784922			23.3753
2018-05-20 13:00:14	2.29099	5.61956		12.9881	0.472961		1.16274	0.0151038	0.0344557	0.199393				0.785853		0.206977	23.7761
2018-05-20 15:00:14	2.44939	5.68313		13.2291	0.522771	0.0476666	1.14979	0.00956356	0.012027	0.114879		0.000815555		0.815668			24.0348
2018-05-20 17:00:14	2.47202	8.1836		11.2206	0.489028	0.0460688	1.33227	0.0124656	0.0202616	0.107295		0.00322338		0.832439		0.292191	25.0115
2018-05-20 19:00:14	2.10091	3.7548		9.0193	0.323528	0.0113175	0.809426		0.00249207	0.00566134		0.00633025	0.000504867	0.610685		0.0687704	16.7137
2018-05-20 21:00:14	2.18916	3.7336		8.81041	0.360484	0.0167765	0.932372	0.00323182	0.0349973	0.0672046				0.682428		0.0533253	16.884
2018-05-20 23:00:14	2.0828	3.35217		8.95502	0.309067	0.00545901	0.800366	0.0158073	0.0149524	0.130048				0.630251			16.2959
average value	1.64394	4.84163		6.81786	0.540504	0.0693608	0.800672	0.0203229	0.192298	0.0347791	0.0058579	0.00835328	0.0025947	0.223356	0.00233419	0.240903	15.4448

## Sheet: Ratio statistics
	DAY		NIGHT		DAY		NIGHT
	F/A JJS	F/A GSS	F/A JJS	F/A GSS	A/P JJS	A/P GSS	A/P JJS	A/P GSS		F/A is formaldehyde/acetaldehyde
2018-05-08 12:00:30	0.610732	0.691131	1.11018	1.42488	11.4606	12.4066	20.5657	25.1364		A/P is acetaldehyde/propionaldehyde
2018-05-09 12:00:30	0.662061	0.385842	0.713483	0.713545	15.4411	23.6392	11.33	20.8445
2018-05-10 12:00:30	0.263457	0.312652	1.42967	0.532978	26.4604	12.0328	15.3176	17.4144
2018-05-11 12:00:30	0.368025	0.499782	0.339172	0.446532	15.1868	11.8386	22.6981	10.5792
2018-05-12 12:00:30	0.543512	0.193995	0.563116	0.975262	5.92418	10.3356	7.50878	28.7686
2018-05-13 12:00:30	0.600598	0.18758	0.753622	0.100668	10.7581	8.88859	5.88296	17.2435
2018-05-14 12:00:30	0.175721	0.56045	0.494651	0.267524	31.6229	2.21674	17.3956	4.89428
2018-05-15 12:00:30	0.235783	0.809427	0.0973686	0.650845	10.2192	3.35897	39.0883	2.20123
2018-05-16 12:00:30	0.37711	0.880716	0.252977	0.856636	2.52097	4.97137	2.99236	4.59751
2018-05-17 12:00:30	0.691463	1.04151	0.421887	1.10993	5.34945	4.8935	4.1918	5.25296
2018-05-18 12:00:30	0.428769	1.01581	0.642046	0.929253	9.25322	5.63961	5.20639	6.11407
2018-05-19 12:00:30	0.322965	1.04344	0.478686	1.03546	16.4225	6.1077	9.62521	6.93528
2018-05-20 12:00:30	0.416946	1.38461	0.304354	1.15481	18.9331	5.69379	17.4302	6.05016

## Sheet: Summary
JSS	average value	Standard deviation			GSS	average value	Standard deviation
formaldehyde	1.644	0.752	1.644±0.752		formaldehyde	2.54	2.09	2.54±2.09
acetaldehyde	4.842	3.629	4.842±3.629		acetaldehyde	4.41	4.36	4.41±4.36
acrolein	0	0	0		acrolein	0	0
acetone	6.818	8.113	6.818±8.113		acetone	7.45	8.13	7.45±8.13
propionaldehyde	0.541	0.506	0.541±0.506		propionaldehyde	0.75	0.82	0.75±0.82
crotoraldehyde	0.069	0.069	0.069±0.069		crotoraldehyde	0.08	0.08	0.08±0.08
butyaldehyde	0.801	0.915	0.801±0.915		butyaldehyde	1.28	1.3	1.28±1.3
benzaldehyde	0.02	0.03	0.02±0.03		benzaldehyde	0.05	0.03	0.05±0.03
isovaleraldehyde	0.192	0.527	0.192±0.527		isovaleraldehyde	0.48	0.43	0.48±0.43
valeraldehyde	0.035	0.055	0.035±0.055		valeraldehyde	0	0
o-Tolualdehyde	0.006	0.005	0.006±0.005		o-Tolualdehyde	0	0.01	0±0.01
m-Tolualdehyde	0.008	0.013	0.008±0.013		m-Tolualdehyde	0.01	0.01	0.01±0.01
p-Tolualdehyde	0.003	0.003	0.003±0.003		p-Tolualdehyde	0	0
hexaldehyde	0.223	0.343	0.223±0.343		hexaldehyde	0.06	0.05	0.06±0.05
2,5-diemthybenzaldehyde	0.002	0.002	0.002±0.002		2,5-diemthybenzaldehyde	0	0
MACR	0.241	0.42	0.241±0.42		MACR	0.52	0.57	0.52±0.57
total	15.445	11.177	15.445±11.177		total	17.63	12.766	17.63±12.766
Composition ratio/JSS					Composition ratio/GSS
formaldehyde	0.106442				formaldehyde	0.144073
acetaldehyde	0.3135				acetaldehyde	0.250142
acetone	0.441437				acetone	0.422575
propionaldehyde	0.0350275				propionaldehyde	0.0425411
MACR	0.0156038				MACR	0.0294952
others	0.0879896				others	0.111174

## Sheet: Daily change
GSS	O3	total OVOCs		JSS	O3	total OVOCs
01:00:00	43.2205	12.9793		01:00:00	20.5047	13.992
03:00:00	35.9692	12.796		03:00:00	20.5676	13.8548
05:00:00	33.2769	13.1517		05:00:00	18.2746	13.7079
07:00:00	31.6974	17.9285		07:00:00	22.2575	14.9158
09:00:00	35.3231	20.6762		09:00:00	39.0827	12.8491
11:00:00	50.5077	23.2636		11:00:00	58.9192	14.2178
13:00:00	61.7436	23.578		13:00:00	68.8676	16.7835
15:00:00	70	20.7268		15:00:00	72.7435	17.2033
17:00:00	62.4974	20.7255		17:00:00	58.6167	16.982
19:00:00	55.6051	14.7361		19:00:00	46.6263	15.2189
21:00:00	46.4154	13.6401		21:00:00	33.7067	15.8662
23:00:00	48.0667	13.4842		23:00:00	25.8423	15.314
GSS	formaldehyde	acetaldehyde	acetone	propionaldehyde	MACR	others		JSS	formaldehyde	acetaldehyde	acetone	propionaldehyde	MACR	others
01:00:00	1.6655	2.95444	6.32185	0.442848	0.457297	1.27807		01:00:00	1.30084	4.30847	6.76702	0.502076	0.343628	0.940727
03:00:00	1.46444	2.89673	6.42444	0.41846	0.328704	1.33904		03:00:00	1.44128	4.04789	6.79233	0.440792	0.280148	0.917024
05:00:00	1.53841	2.96945	6.6253	0.42835	0.471803	1.26351		05:00:00	1.46604	3.72269	6.95784	0.424835	0.249909	0.944262
07:00:00	2.52271	4.41212	8.05074	0.729956	0.492438	1.90991		07:00:00	1.34006	4.14849	7.5206	0.502707	0.450266	1.16146
09:00:00	2.62915	5.68507	8.6355	0.988485	0.809996	2.36418		09:00:00	1.49006	4.00486	6.35459	0.490768	0.0550238	0.931131
11:00:00	3.55023	6.42123	8.80026	1.26274	0.644403	2.73343		11:00:00	1.6217	4.6491	6.19905	0.538738	0.28694	1.0326
13:00:00	4.40344	6.14524	8.36741	1.33416	0.623439	2.89612		13:00:00	1.81415	5.86747	6.7738	0.665584	0.377963	1.40085
15:00:00	4.11966	5.69002	8.43247	1.01162	0.671374	2.41213		15:00:00	1.99952	6.05785	6.66552	0.708784	0.278486	1.62168
17:00:00	3.04988	5.84074	8.29052	0.880216	0.52994	2.17501		17:00:00	1.98995	5.7546	7.0854	0.616051	0.132634	1.42376
19:00:00	1.95308	3.64951	6.75237	0.556627	0.486505	1.5625		19:00:00	1.924	5.42041	6.23291	0.555991	0.222119	0.983028
21:00:00	1.88351	3.1939	6.34793	0.484466	0.418388	1.44059		21:00:00	1.73205	5.30434	7.13421	0.521591	0.14075	1.0982
23:00:00	1.77354	3.16797	6.42704	0.462056	0.366311	1.40001		23:00:00	1.59579	4.74905	7.3311	0.511344	0.121268	1.05212
